# Supplementary material for: Eye care utilization pattern in South Africa: results from SANHANES-1
Source: PubMed Central journal article supplement (PMC7430111; doi:10.1186/s12913-020-05621-8), 2020-08-17
Supplement: 12913_2020_5621_MOESM2_ESM.pdf [file 12913_2020_5621_MOESM2_ESM.pdf]

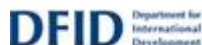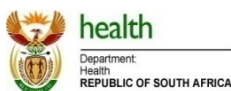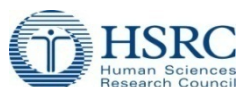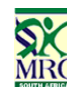

**THE SOUTH AFRICAN NATIONAL HEALTH AND NUTRITION EXAMINATION  
SURVEY, 2011/2012  
(SANHANES-1)**

**Adult Clinical Examination Form: 15 years and older**

|   |                         |                                                                                                                     |   |   |   |   |   |   |   |   |
|---|-------------------------|---------------------------------------------------------------------------------------------------------------------|---|---|---|---|---|---|---|---|
|   | <b>Examination Date</b> | <table border="1"><tr><td>D</td><td>D</td><td>M</td><td>M</td><td>Y</td><td>Y</td><td>Y</td><td>Y</td></tr></table> | D | D | M | M | Y | Y | Y | Y |
| D | D                       | M                                                                                                                   | M | Y | Y | Y | Y |   |   |   |

**Time of arrival**

|   |   |   |   |   |
|---|---|---|---|---|
| H | H | : | M | M |
|---|---|---|---|---|

**Time of departure**

|   |   |   |   |   |
|---|---|---|---|---|
| H | H | : | M | M |
|---|---|---|---|---|

**PASTE  
APPOINTMENT  
CARD  
HERE**

|                            |                                                                  |   |
|----------------------------|------------------------------------------------------------------|---|
| <b>Final Response code</b> | Full clinical examination completed and bloods collected.....    | 1 |
|                            | Partial clinical examination completed and bloods collected..... | 2 |
|                            | Only full clinical examination completed .....                   | 3 |
|                            | Only partial clinical examination completed.....                 | 4 |
|                            | Bloods collected only .....                                      | 5 |

| <b>B. Examination Checklist</b> |                  |                                             | <b>Completed</b> |   | <b>If No, Specify why not</b> |
|---------------------------------|------------------|---------------------------------------------|------------------|---|-------------------------------|
| Section<br>A - F                | Doctor           | History and clinical examination            | Y                | N |                               |
|                                 | Doctor           | Fundoscopy – only for diabetic participants | Y                | N |                               |
|                                 | Doctor           | Blood pressure and pulse rate               | Y                | N |                               |
|                                 | Doctor           | Cardiovascular Fitness (step test)          | Y                | N |                               |
| Section<br>G                    | Clinic Assistant | Weight                                      | Y                | N |                               |
|                                 | Clinic Assistant | Height                                      | Y                | N |                               |
|                                 | Clinic Assistant | Mid upper arm circumference                 | Y                | N |                               |
|                                 | Clinic Assistant | Waist circumference                         | Y                | N |                               |
|                                 | Clinic Assistant | Hip circumference                           | Y                | N |                               |
|                                 | Clinic Assistant | Triceps Skinfold                            | Y                | N |                               |
|                                 | Clinic Assistant | Sub scapular Skinfold                       | Y                | N |                               |
|                                 | Clinic Assistant | Biceps Skinfold                             | Y                | N |                               |
| Section<br>H - J                | Nurse            | Spirometry                                  | Y                | N |                               |
|                                 | Nurse            | Bioelectrical Impedance                     | Y                | N |                               |
|                                 | Nurse            | Blood collection                            | Y                | N |                               |

|                             |                     |  |  |  |  |  |  |  |
|-----------------------------|---------------------|--|--|--|--|--|--|--|
| <b>Clinic Administrator</b> | <b>Name</b>         |  |  |  |  |  |  |  |
|                             | <b>Staff Number</b> |  |  |  |  |  |  |  |

|               |                     |  |  |  |  |  |  |  |
|---------------|---------------------|--|--|--|--|--|--|--|
| <b>Doctor</b> | <b>Name</b>         |  |  |  |  |  |  |  |
|               | <b>Staff Number</b> |  |  |  |  |  |  |  |

|                         |                     |  |  |  |  |  |  |  |
|-------------------------|---------------------|--|--|--|--|--|--|--|
| <b>Clinic Assistant</b> | <b>Name</b>         |  |  |  |  |  |  |  |
|                         | <b>Staff Number</b> |  |  |  |  |  |  |  |

|              |                     |  |  |  |  |  |  |  |
|--------------|---------------------|--|--|--|--|--|--|--|
| <b>Nurse</b> | <b>Name</b>         |  |  |  |  |  |  |  |
|              | <b>Staff Number</b> |  |  |  |  |  |  |  |

# INSTRUCTIONS

## Sections A – F to be completed by the Doctor

Doctor

Start time

H H : M M

### SECTION A

### GENERAL PATIENT HISTORY (all participants)

I would like to ask you about your general health (circle as appropriate)

|   |                                                                                                                                                         |                                                                                                                                                                                                             |
|---|---------------------------------------------------------------------------------------------------------------------------------------------------------|-------------------------------------------------------------------------------------------------------------------------------------------------------------------------------------------------------------|
| 1 | When was the last time you had something to eat?                                                                                                        | Last night (before midnight)..... 1<br>06:00 – 08:00..... 2<br>08:00 – 10:00..... 3<br>10:00 – 12:00..... 4<br>12:00 – 14:00..... 5<br>14:00 – 16:00..... 6<br>16:00 – 18:00..... 7<br>18:00 – 20:00..... 8 |
| 2 | When was the last time you had something to drink?                                                                                                      | Last night (before midnight)..... 1<br>06:00 – 08:00..... 2<br>08:00 – 10:00..... 3<br>10:00 – 12:00..... 4<br>12:00 – 14:00..... 5<br>14:00 – 16:00..... 6<br>16:00 – 18:00..... 7<br>18:00 – 20:00..... 8 |
| 3 | In your opinion, how would you describe your health today?<br><b>If completely healthy, go to Question 7</b>                                            | Completely healthy ..... 1<br>Feeling unwell ..... 2<br>Don't know ..... 3                                                                                                                                  |
| 4 | How long have you not been feeling well or had this illness?                                                                                            | One day ..... 1<br>One week ..... 2<br>One month ..... 3<br>Longer..... 4                                                                                                                                   |
| 5 | Do you have a fever today?                                                                                                                              | Yes ..... 1<br>No..... 2                                                                                                                                                                                    |
| 6 | Have you sought medical care for your illness or health problem?<br>If yes, where have you gone for medical care?<br><b>Multiple responses possible</b> | Yes: GP / Private practitioner ..... 1<br>Yes: Clinic..... 2<br>Yes: Day hospital ..... 3<br>Yes: Other public hospital..... 4<br>Yes: Private hospital ..... 5<br>No..... 6                                |
| 7 | Do you have asthma?                                                                                                                                     | Yes ..... 1<br>No..... 2                                                                                                                                                                                    |
| 8 | Do you have any past history of illness?<br>If yes, what history of illness do you have?<br><b>Multiple responses possible</b>                          | Yes: ENT..... 1<br>Yes: Heart ..... 2<br>Yes: Blood Sugar ..... 3<br>Yes: Chest ..... 4<br>Yes: Abdomen ..... 5<br>Yes: Cancer ..... 6<br>Yes: Other (specify) ..... 7<br>No..... 8                         |

## SECTION A

## GENERAL PATIENT HISTORY (all participants)

|    |                                                                                                                                                 |                                                                                                                                                                                                                                                                                                                                                                                                                                                                                                                                                                                                                                                                                                                                                                          |
|----|-------------------------------------------------------------------------------------------------------------------------------------------------|--------------------------------------------------------------------------------------------------------------------------------------------------------------------------------------------------------------------------------------------------------------------------------------------------------------------------------------------------------------------------------------------------------------------------------------------------------------------------------------------------------------------------------------------------------------------------------------------------------------------------------------------------------------------------------------------------------------------------------------------------------------------------|
| 9  | <p>Is there a family history of illness?<br/>If yes, what illness runs in the family?</p> <p><b>Multiple responses possible</b></p>             | <p>Yes: Heart ..... 1<br/>                 Yes: Blood Sugar ..... 2<br/>                 Yes: Chest ..... 3<br/>                 Yes: Abdomen ..... 4<br/>                 Yes: Cancer ..... 5<br/>                 Yes: Other (specify) ..... 6<br/>                 No ..... 7</p>                                                                                                                                                                                                                                                                                                                                                                                                                                                                                     |
| 10 | <p>Have you had any past surgery?<br/>If yes, what surgery have you had?</p> <p><b>Multiple responses possible</b></p>                          | <p>Yes: ENT ..... 1<br/>                 Yes: Heart ..... 2<br/>                 Yes: Chest ..... 3<br/>                 Yes: Abdomen ..... 4<br/>                 Yes: Cancer ..... 5<br/>                 Yes: Other (specify) ..... 6<br/>                 No ..... 7</p>                                                                                                                                                                                                                                                                                                                                                                                                                                                                                             |
| 11 | <p>Have you had any injuries?<br/>If yes, what type of injuries did you have?</p> <p><b>Multiple responses possible</b></p>                     | <p>Yes: Head ..... 1<br/>                 Yes: Limbs ..... 2<br/>                 Yes: Chest ..... 3<br/>                 Yes: Abdomen ..... 4<br/>                 No ..... 5</p>                                                                                                                                                                                                                                                                                                                                                                                                                                                                                                                                                                                       |
| 12 | <p>Are you currently on any medication?<br/>If yes, what type of medication are you currently on?</p> <p><b>Multiple responses possible</b></p> | <p>Yes: Antibiotics ..... 1<br/>                 Yes: Anti-inflammatory ..... 2<br/>                 Yes: Pain ..... 3<br/>                 Yes: Chest ..... 4<br/>                 Yes: ENT ..... 5<br/>                 Yes: Blood sugar ..... 6<br/>                 Yes: Blood pressure ..... 7<br/>                 Yes: Diuretics ..... 8<br/>                 Yes: Heart disease ..... 9<br/>                 Yes: Aspirin (daily) ..... 10<br/>                 Yes: Antilipids ..... 11<br/>                 Yes: Abdominal illness (diarrhoea or other) ..... 12<br/>                 Yes: Depression ..... 13<br/>                 Yes: Other mental illness ..... 14<br/>                 Yes: Other (specify) ..... 15<br/>                 No ..... 16</p> |
| 13 | <p>Do you have any physical disabilities?</p> <p><b>Multiple responses possible</b></p>                                                         | <p>Yes: Impairment in mobility ..... 1<br/>                 Yes: Spinal cord disability ..... 2<br/>                 Yes: Brain disability ..... 3<br/>                 Yes: Vision disability ..... 4<br/>                 Yes: Hearing disability ..... 5<br/>                 Yes: Cognitive disability ..... 6<br/>                 Yes: Other (specify) ..... 7<br/>                 No ..... 8</p>                                                                                                                                                                                                                                                                                                                                                                 |
| 14 | <p>Do you have any mental disabilities?</p> <p><b>Multiple responses possible</b></p>                                                           | <p>Yes: Mental disorder ..... 1<br/>                 Yes: Neurological disorder ..... 2<br/>                 Yes: Learning disability ..... 3<br/>                 Yes: Mental retardation ..... 4<br/>                 Yes: Other (specify) ..... 5<br/>                 No ..... 6</p>                                                                                                                                                                                                                                                                                                                                                                                                                                                                                 |

## SECTION B

# DETAILED PATIENT HISTORY: Over the past 3 months (all participants)

### 1 GENERAL SYSTEMS (Over the past three months)

|     |                                                |                                                                                               |
|-----|------------------------------------------------|-----------------------------------------------------------------------------------------------|
| 1.1 | Have you lost weight without dieting?          | Yes ..... 1<br>No ..... 2                                                                     |
| 1.2 | Have you gained weight?                        | Yes ..... 1<br>No ..... 2                                                                     |
| 1.3 | Has your appetite changed?                     | Yes: It has increased ..... 1<br>Yes: It has decreased ..... 2<br>No ..... 3                  |
| 1.4 | Has your eating pattern changed?               | Yes: He/she eats more frequently ..... 1<br>Yes: He/she eats less often ..... 2<br>No ..... 3 |
| 1.5 | Has your fluid intake changed?                 | Yes: It has increased ..... 1<br>Yes: It has decreased ..... 2<br>No ..... 3                  |
| 1.6 | Have you been feeling thirsty more than usual? | Yes ..... 1<br>No ..... 2                                                                     |
| 1.7 | Did you have a fever?                          | Yes ..... 1<br>No ..... 2                                                                     |
| 1.8 | Have you felt tired / lethargic?               | Yes ..... 1<br>No ..... 2                                                                     |
| 1.9 | Did you have night sweats?                     | Yes ..... 1<br>No ..... 2                                                                     |

### 2 HEAD, EYES, EARS, NOSE, MOUTH AND THROAT (Over the past three months)

|     |                                                                                           |                                                                                                                                                                                                                                                                                             |
|-----|-------------------------------------------------------------------------------------------|---------------------------------------------------------------------------------------------------------------------------------------------------------------------------------------------------------------------------------------------------------------------------------------------|
| 2.1 | Have you had any headaches?                                                               | Yes: Migraine ..... 1<br>Yes: Tension ..... 2<br>Yes: Cluster ..... 3<br>Yes: Other (specify) ..... 4<br>No ..... 5                                                                                                                                                                         |
| 2.2 | Have you had repeated episodes of dizziness?                                              | Yes ..... 1<br>No ..... 2                                                                                                                                                                                                                                                                   |
| 2.3 | Have you had a seizure?<br><br><b>Multiple responses possible</b>                         | Yes: Grand mal ..... 1<br>Yes: Petit mal ..... 2<br>Yes: Other (specify) ..... 3<br>No ..... 4                                                                                                                                                                                              |
| 2.4 | Have you had any head trauma?                                                             | Yes ..... 1<br>No ..... 2                                                                                                                                                                                                                                                                   |
| 2.5 | Have you had any of the following eye problems?<br><br><b>Multiple responses possible</b> | Yes: Difficulties in seeing things ..... 1<br>Yes: Cannot see at night ..... 2<br>Yes: Cannot see from the sides of your eyes ..... 3<br>Yes: Discharge (yellow) ..... 4<br>Yes: Discharge (watery) ..... 5<br>Yes: Discharge (other) ..... 6<br>Yes: Other (specify) ..... 7<br>No ..... 8 |

## SECTION B

### DETAILED PATIENT HISTORY: Over the past 3 months

(all participants)

|     |                                                                                             |                                                                                                                                                                                                                                                                                                  |
|-----|---------------------------------------------------------------------------------------------|--------------------------------------------------------------------------------------------------------------------------------------------------------------------------------------------------------------------------------------------------------------------------------------------------|
| 2.6 | Have you had any of the following ear problems?<br><br><b>Multiple responses possible</b>   | Yes: Ear pain ..... 1<br>Yes: Ringing in the ears..... 2<br>Yes: Feels like the room is spinning ..... 3<br>Yes: Discharge (yellow)..... 4<br>Yes: Discharge (watery) ..... 5<br>Yes: Discharge (bloody) ..... 6<br>Yes: Discharge (other) ..... 7<br>Yes: Other (specify) ..... 8<br>No ..... 9 |
| 2.7 | Have you had any of the following nose problems?<br><br><b>Multiple responses possible</b>  | Yes: Nose bleeds..... 1<br>Yes: Discharge ..... 2<br>Yes: Sinus ..... 3<br>Yes: Other (specify) ..... 4<br>No..... 5                                                                                                                                                                             |
| 2.8 | Have you had any of the following mouth problems?<br><br><b>Multiple responses possible</b> | Yes: Sore throat ..... 1<br>Yes: Toothache ..... 2<br>Yes: Pain in the mouth or gums..... 3<br>Yes: Other (specify) ..... 4<br>No ..... 5                                                                                                                                                        |

### 3 RESPIRATORY SYSTEM (Over the past three months)

|     |                                                                                                                                                                         |                                                                                                                            |
|-----|-------------------------------------------------------------------------------------------------------------------------------------------------------------------------|----------------------------------------------------------------------------------------------------------------------------|
| 3.1 | Have you had any difficulty in breathing / shortness of breath?<br>If yes, what kind of difficulty did you have in breathing?<br><br><b>Multiple responses possible</b> | Yes: Worse at night ..... 1<br>Yes: Wheezing ..... 2<br>Yes: Stridor ..... 3<br>Yes: Other (specify) ..... 4<br>No ..... 5 |
| 3.2 | Did you have a cough?                                                                                                                                                   | Yes ..... 1<br>No ..... 2                                                                                                  |
| 3.3 | If yes, please specify the type of cough?                                                                                                                               | Dry ..... 1<br>Wet ..... 2<br>Other (specify)..... 3<br>.....                                                              |
| 3.4 | If yes, please specify the colour of the sputum?                                                                                                                        | White ..... 1<br>Yellow ..... 2<br>Green ..... 3<br>Blood ..... 4<br>Other (specify)..... 5<br>.....                       |
| 3.5 | Were you in contact with a person that coughs a lot?                                                                                                                    | Yes ..... 1<br>No ..... 2                                                                                                  |
| 3.6 | Did you have an asthma attack?                                                                                                                                          | Yes ..... 1<br>No ..... 2                                                                                                  |

### 4 CARDIOVASCULAR SYSTEM (Over the past three months)

|     |                                                   |                           |
|-----|---------------------------------------------------|---------------------------|
| 4.1 | Did you have any chest pain?                      | Yes ..... 1<br>No ..... 2 |
| 4.2 | Did you have shortness of breath when lying down? | Yes ..... 1<br>No ..... 2 |

## SECTION B

### DETAILED PATIENT HISTORY: Over the past 3 months

(all participants)

|     |                                                |                               |   |
|-----|------------------------------------------------|-------------------------------|---|
| 4.3 | Did you have swelling of any of the following? | Yes: Hands .....              | 1 |
|     |                                                | Yes: Feet .....               | 2 |
|     |                                                | Yes: Both hands and feet..... | 3 |
|     |                                                | Yes: Other (specify) .....    | 4 |
|     |                                                | No.....                       | 5 |

#### 5 GASTRO-INTESTINAL SYSTEM (Over the past three months)

|     |                                                                                             |                                                  |    |
|-----|---------------------------------------------------------------------------------------------|--------------------------------------------------|----|
| 5.1 | Did you have any of the following tummy problems?<br><br><b>Multiple responses possible</b> | Yes: Pain in the stomach .....                   | 1  |
|     |                                                                                             | Yes: Nausea .....                                | 2  |
|     |                                                                                             | Yes: Vomiting.....                               | 3  |
|     |                                                                                             | Yes: Diarrhoea .....                             | 4  |
|     |                                                                                             | Yes: Constipation.....                           | 5  |
|     |                                                                                             | Yes: Bloody stools.....                          | 6  |
|     |                                                                                             | Yes: Yellowing (discolouration) of the eyes..... | 7  |
|     |                                                                                             | Yes: Problem eating or swallowing.....           | 8  |
|     |                                                                                             | Yes: Other (specify) .....                       | 9  |
|     |                                                                                             | No.....                                          | 10 |

#### 6 GENITO-URINARY SYSTEM (Over the past three months)

|     |                                                                                                               |                                             |   |
|-----|---------------------------------------------------------------------------------------------------------------|---------------------------------------------|---|
| 6.1 | Did you pass urine more than usual?                                                                           | Yes .....                                   | 1 |
|     |                                                                                                               | No.....                                     | 2 |
| 6.2 | Did you have pain when passing urine?                                                                         | Yes .....                                   | 1 |
|     |                                                                                                               | No.....                                     | 2 |
| 6.3 | Did you have blood in the urine?                                                                              | Yes .....                                   | 1 |
|     |                                                                                                               | No.....                                     | 2 |
| 6.4 | Did the colour of your urine differ from what it usually is?                                                  | Yes .....                                   | 1 |
|     |                                                                                                               | No.....                                     | 2 |
| 6.5 | Did you experience any of the following?<br><br><b>Multiple responses possible</b><br><br><b>FOR MEN ONLY</b> | Yes: Reduced force when passing urine ..... | 1 |
|     |                                                                                                               | Yes: Hesitancy to pass urine .....          | 2 |
|     |                                                                                                               | Yes: Dribble when passing urine .....       | 3 |
|     |                                                                                                               | Yes: Other (specify) .....                  | 4 |
|     |                                                                                                               | No.....                                     | 5 |

#### 7 SEXUAL AND REPRODUCTIVE SYSTEM (Over the past three months)

|     |                                                                                                                  |                                                      |   |
|-----|------------------------------------------------------------------------------------------------------------------|------------------------------------------------------|---|
| 7.1 | Did you have any of the following problems?<br><br><b>Multiple responses possible</b><br><br><b>FOR MEN ONLY</b> | Yes: Urethral discharge “drops” .....                | 1 |
|     |                                                                                                                  | Yes: Groin swelling .....                            | 2 |
|     |                                                                                                                  | Yes: Testicular swelling.....                        | 3 |
|     |                                                                                                                  | Yes: Other (specify) .....                           | 4 |
|     |                                                                                                                  | No.....                                              | 5 |
| 7.2 | Did you have any of the following problems?<br><br><b>Multiple responses possible</b><br><b>FOR WOMEN ONLY</b>   | Yes: Vaginal discharge .....                         | 1 |
|     |                                                                                                                  | Yes: Vaginal bleeding (other than menstruation)..... | 2 |
|     |                                                                                                                  | Yes: Other (specify) .....                           | 3 |
|     |                                                                                                                  | No.....                                              | 4 |
| 7.3 | When was the last time you had a pap smear?<br><br><b>FOR WOMEN ONLY</b>                                         | 0 – 6 months ago .....                               | 1 |
|     |                                                                                                                  | 6 – 12 months ago .....                              | 2 |
|     |                                                                                                                  | 1 – 2 years .....                                    | 3 |
|     |                                                                                                                  | 2 – 4 years ago.....                                 | 4 |
|     |                                                                                                                  | 5 – 10 years ago .....                               | 5 |
|     |                                                                                                                  | More than 10 years ago .....                         | 6 |
|     |                                                                                                                  | Never .....                                          | 7 |

**SECTION B****DETAILED PATIENT HISTORY: Over the past 3 months**

(all participants)

**8 SKIN AND LYMPH NODES (Over the past three months)**

|     |                                                                                                                          |                                                                                                                                                                                                                      |
|-----|--------------------------------------------------------------------------------------------------------------------------|----------------------------------------------------------------------------------------------------------------------------------------------------------------------------------------------------------------------|
| 8.1 | Did you have any of the following skin problems?<br><br><b>Multiple responses possible</b>                               | Yes: Skin rashes (local)..... 1<br>Yes: Skin rashes (generalised) ..... 2<br>Yes: Skin rashes (itchy) ..... 3<br>Yes: Bruises..... 4<br>Yes: Skin discolouration..... 5<br>Yes: Other (specify) ..... 6<br>No..... 7 |
| 8.2 | Did you have any swollen glands?<br>If yes, which of your glands were swollen?<br><br><b>Multiple responses possible</b> | Yes: Neck ..... 1<br>Yes: Axilla..... 2<br>Yes: Epitrochlear..... 3<br>Yes: Other (specify) ..... 4<br>No..... 5                                                                                                     |

**9 MUSCULOSKELETAL DISORDERS (Over the past three months)**

|     |                                                                                                     |                                                                                                                                                                          |
|-----|-----------------------------------------------------------------------------------------------------|--------------------------------------------------------------------------------------------------------------------------------------------------------------------------|
| 9.1 | Did you have any of the following muscle / bone problems?<br><br><b>Multiple responses possible</b> | Yes: Pain in the joints ..... 1<br>Yes: Swelling in the joints ..... 2<br>Yes: Arthritis ..... 3<br>Yes: Muscle pain..... 4<br>Yes: Other (specify) ..... 5<br>No..... 6 |
|-----|-----------------------------------------------------------------------------------------------------|--------------------------------------------------------------------------------------------------------------------------------------------------------------------------|

**SECTION C****SYSTEMATIC CLINICAL EXAMINATION (all participants)****1 GENERAL SYSTEMS**

|     |                                                |                                                                                                                                                                                                                                 |
|-----|------------------------------------------------|---------------------------------------------------------------------------------------------------------------------------------------------------------------------------------------------------------------------------------|
| 1.1 | Pallor                                         | Yes..... 1<br>No..... 2                                                                                                                                                                                                         |
| 1.2 | Rash<br><br><b>Multiple responses possible</b> | Yes: Scratch marks..... 1<br>Yes: Erythematous..... 2<br>Yes: Blanching on pressure..... 3<br>Yes: Purpuric..... 4<br>Yes: Macules..... 5<br>Yes: Papules..... 6<br>Yes: Vesicles ..... 7<br>Yes: Impetigo ..... 8<br>No..... 9 |
| 1.3 | Jaundice                                       | Yes..... 1<br>No..... 2                                                                                                                                                                                                         |
| 1.4 | Central cyanosis                               | Yes..... 1<br>No..... 2                                                                                                                                                                                                         |
| 1.5 | Peripheral cyanosis                            | Yes..... 1<br>No..... 2                                                                                                                                                                                                         |
| 1.6 | Finger clubbing                                | Yes..... 1<br>No..... 2                                                                                                                                                                                                         |
| 1.7 | General oedema                                 | Yes..... 1<br>No..... 2                                                                                                                                                                                                         |
| 1.8 | Peripheral oedema                              | Yes..... 1<br>No..... 2                                                                                                                                                                                                         |



## SECTION C

## SYSTEMATIC CLINICAL EXAMINATION (all participants)

|      |                                                                                                         |                                                                                                                                                                                                                                                                                                                                                                        |
|------|---------------------------------------------------------------------------------------------------------|------------------------------------------------------------------------------------------------------------------------------------------------------------------------------------------------------------------------------------------------------------------------------------------------------------------------------------------------------------------------|
| 1.9  | Lymphadenopathy<br>If yes, please specify the position<br><br><b>Multiple responses possible</b>        | Yes: Neck ..... 1<br>Yes: Axilla ..... 2<br>Yes: Epitrochlear ..... 3<br>No ..... 4                                                                                                                                                                                                                                                                                    |
| 1.10 | Hydration<br>If dehydrated, specify the grade / symptoms<br><br><b>Multiple responses possible</b>      | Normal ..... 1<br><b>Dehydrated (mild-moderate)</b><br>Restlessness / irritability ..... 2<br>Sunken eyes ..... 3<br>Headache ..... 4<br>Decreased urine output ..... 5<br>Skin turgor <2 seconds ..... 6<br><b>Dehydrated (severe)</b><br>Sleepy/lethargic ..... 7<br>Sunken eyes ..... 8<br>Dizziness or light-headedness ..... 9<br>Skin turgor >2 seconds ..... 10 |
| 1.11 | Dysmorphism                                                                                             | Yes ..... 1<br>No ..... 2                                                                                                                                                                                                                                                                                                                                              |
| 1.12 | Hearing                                                                                                 | Normal ..... 1<br>Loss of hearing ..... 2                                                                                                                                                                                                                                                                                                                              |
| 1.13 | If loss of hearing, record which of the following are present<br><br><b>Multiple responses possible</b> | Inability to hear people clearly and fully ..... 1<br>Frequent requests for repetition or clarification ..... 2<br>Tendency to bluff ..... 3<br>Tendency to lip read ..... 4<br>None ..... 5                                                                                                                                                                           |
| 1.14 | Vision                                                                                                  | Normal ..... 1<br>Loss of vision ..... 2                                                                                                                                                                                                                                                                                                                               |
| 1.15 | If loss of vision, record which of the following are present<br><br><b>Multiple responses possible</b>  | Blurred vision ..... 1<br>Need for more light ..... 2<br>Gradual loss of peripheral, or side, vision ..... 3<br>Difficulty driving at night ..... 4<br>Double vision ..... 5<br>Difficulty in reading ..... 6<br>Difficulty in distinguishing colours ..... 7<br>Straight lines look wavy ..... 8<br>Sensitivity to glare ..... 9                                      |
| 1.16 | Fundoscopy: Macula<br><br><b>Only for diabetics</b><br><b>Multiple responses possible</b>               | Normal ..... 1<br>Abnormal: Oedema ..... 2<br>Abnormal: Lipid deposition ..... 3<br>Abnormal: Capillary obliteration ..... 4<br>Abnormal: Other (specify) ..... 5<br>.....                                                                                                                                                                                             |
| 1.17 | Fundoscopy: Retina<br><br><b>Only for diabetics</b><br><b>Multiple responses possible</b>               | Normal ..... 1<br>Abnormal: Microaneurisms ..... 2<br>Abnormal: Intra retinal haemorrhages ..... 3<br>Abnormal: Exudates ..... 4<br>Abnormal: Neovascularisation ..... 5<br>Abnormal: Vitreous haemorrhage ..... 6<br>Abnormal: Other (specify) ..... 7<br>.....                                                                                                       |

**SECTION C****SYSTEMATIC CLINICAL EXAMINATION** (all participants)**2 EARS, NOSE AND THROAT**

|     |                                                                                                    |                                                                                                       |
|-----|----------------------------------------------------------------------------------------------------|-------------------------------------------------------------------------------------------------------|
| 2.1 | Mouth sores                                                                                        | Yes ..... 1<br>No ..... 2                                                                             |
| 2.2 | Nasal Discharge<br>If yes, specify the type of discharge<br><br><b>Multiple responses possible</b> | Yes: Yellow ..... 1<br>Yes: Watery ..... 2<br>Yes: Bloody ..... 3<br>Yes: Other ..... 4<br>No ..... 5 |
| 2.3 | Swollen tonsils                                                                                    | Yes ..... 1<br>No ..... 2                                                                             |
| 2.4 | Ears<br><br><b>Multiple responses possible</b>                                                     | Normal ..... 1<br>Infection ..... 2<br>No ..... 3                                                     |

**3 RESPIRATORY SYSTEM**

|     |                                                        |                                                                                                                                                                                                                       |
|-----|--------------------------------------------------------|-----------------------------------------------------------------------------------------------------------------------------------------------------------------------------------------------------------------------|
| 3.1 | Nasal flare                                            | Yes ..... 1<br>No ..... 2                                                                                                                                                                                             |
| 3.2 | Chest shape<br><br><b>Multiple responses possible</b>  | Normal ..... 1<br>Pectus carinatum ..... 2<br>Pectus excavatum ..... 3<br>Scoliosis ..... 4<br>Kyphosis ..... 5<br>Gynecomastia (male) ..... 6<br>Barrel chest deformity ..... 7                                      |
| 3.3 | Rib retraction                                         | Yes ..... 1<br>No ..... 2                                                                                                                                                                                             |
| 3.4 | Tachypnoea                                             | Yes: >10 years: >20/min ..... 1<br>No ..... 2                                                                                                                                                                         |
| 3.5 | Cyanosis                                               | Yes: Central ..... 1<br>Yes: Peripheral ..... 2<br>No ..... 3                                                                                                                                                         |
| 3.6 | Trachea displacement                                   | Yes ..... 1<br>No ..... 2                                                                                                                                                                                             |
| 3.7 | Percussion                                             | Normal ..... 1<br>Abnormal: Consolidation ..... 2<br>Abnormal: Pleural effusion ..... 3                                                                                                                               |
| 3.8 | Auscultation<br><br><b>Multiple responses possible</b> | Normal ..... 1<br>Abnormal: Unequal bilateral air entry ..... 2<br>Abnormal: Crepitations ..... 3<br>Abnormal: Rhonchi ..... 4<br>Abnormal: Wheezing ..... 5<br>Abnormal: Consolidation (Bronchial Breathing) ..... 6 |

**4 CARDIOVASCULAR SYSTEM**

|     |                                                |                                                                   |
|-----|------------------------------------------------|-------------------------------------------------------------------|
| 4.1 | Apex<br><br><b>Multiple responses possible</b> | Normal ..... 1<br>Visible pulsations ..... 2<br>Displaced ..... 3 |
| 4.2 | Pulse<br><br><b>Record Pulse in Section E</b>  | Normal ..... 1<br>> 10 Years: 60-100/min<br>Tachycardia ..... 2   |

## SECTION C

## SYSTEMATIC CLINICAL EXAMINATION (all participants)

|     |                                                                      |                                                                                                                                                                                                                                                                                                                                        |
|-----|----------------------------------------------------------------------|----------------------------------------------------------------------------------------------------------------------------------------------------------------------------------------------------------------------------------------------------------------------------------------------------------------------------------------|
| 4.3 | Auscultation: Heart sounds<br><br><b>Multiple responses possible</b> | Normal..... 1<br>Abnormal: Systolic Grade I ..... 2<br>Abnormal: Systolic Grade II ..... 3<br>Abnormal: Systolic Grade III ..... 4<br>Abnormal: Systolic Grade IV ..... 5<br>Abnormal: Diastolic Grade I..... 6<br>Abnormal: Diastolic Grade II..... 7<br>Abnormal: Diastolic Grade III..... 8<br>Abnormal: Diastolic Grade IV ..... 9 |
| 4.4 | Auscultation: Arrhythmia                                             | Yes: Tachyarrhythmia ..... 1<br>Yes: Bradyarrhythmia ..... 2<br>Yes: Atrial Fibrillation ..... 3<br>No ..... 4                                                                                                                                                                                                                         |

### 5 GASTRO-INTESTINAL SYSTEM

|     |                                                                                      |                                                                                                                                                                                                                                                                                              |
|-----|--------------------------------------------------------------------------------------|----------------------------------------------------------------------------------------------------------------------------------------------------------------------------------------------------------------------------------------------------------------------------------------------|
| 5.1 | Distension                                                                           | Yes ..... 1<br>No ..... 2                                                                                                                                                                                                                                                                    |
| 5.2 | Tenderness<br>If yes, specify location<br><br><b>Multiple responses possible</b>     | Yes: Upper central ..... 1<br>Yes: Lower central ..... 2<br>Yes: Left hypochondrium..... 3<br>Yes: Right hypochondrium ..... 4<br>Yes: Left inguinal ..... 5<br>Yes: Right inguinal ..... 6<br>Yes: Left flank ..... 7<br>Yes: Right flank ..... 8<br>Yes: Suprapubic ..... 9<br>No ..... 10 |
| 5.3 | Abdominal mass<br>If yes, specify location<br><br><b>Multiple responses possible</b> | Yes: Upper central ..... 1<br>Yes: Lower central ..... 2<br>Yes: Left hypochondrium..... 3<br>Yes: Right hypochondrium ..... 4<br>Yes: Left inguinal ..... 5<br>Yes: Right inguinal ..... 6<br>Yes: Left flank ..... 7<br>Yes: Right flank ..... 8<br>Yes: Suprapubic ..... 9<br>No ..... 10 |
| 5.4 | Organomegaly                                                                         | Yes: Hepatomegaly..... 1<br>Yes: Splenomegaly..... 2<br>No ..... 3                                                                                                                                                                                                                           |
| 5.5 | Renal mass                                                                           | Yes ..... 1<br>No ..... 2                                                                                                                                                                                                                                                                    |
| 5.6 | Hernias                                                                              | Yes ..... 1<br>No ..... 2                                                                                                                                                                                                                                                                    |
| 5.7 | Bowel sounds                                                                         | Normal..... 1<br>Absent ..... 2<br>Accentuated ..... 3                                                                                                                                                                                                                                       |

## SECTION C

## SYSTEMATIC CLINICAL EXAMINATION (all participants)

### 6 CENTRAL NERVOUS SYSTEM

|     |                                                                                                                                   |                                                                                                                                                                                                                          |
|-----|-----------------------------------------------------------------------------------------------------------------------------------|--------------------------------------------------------------------------------------------------------------------------------------------------------------------------------------------------------------------------|
| 6.1 | Face, Head shape, neck<br>If abnormal, specify which of the following are present<br><br><b>Multiple responses possible</b>       | Normal..... 1<br>Abnormal: Facial tics ..... 2<br>Abnormal: Bell's palsy ..... 3<br>Abnormal: Padget's disease ..... 4<br>Abnormal: Acromegaly..... 5<br>Abnormal: Cervical arthritis..... 6<br>Abnormal: Thyroid..... 7 |
| 6.2 | Motor function: gait<br>If abnormal, specify which of the following are present<br><br><b>Multiple responses possible</b>         | Normal..... 1<br>Abnormal: Ataxia..... 2<br>Abnormal: Spasticity..... 3<br>Abnormal: Staggering..... 4                                                                                                                   |
| 6.3 | Motor function: movements<br>If abnormal, specify which of the following are present<br><br><b>Multiple responses possible</b>    | Normal..... 1<br>Abnormal: Unable to sit/stand ..... 2<br>Abnormal: Tremor ..... 3<br>Abnormal: Tics..... 4<br>Abnormal: Rolling eye movements ..... 5                                                                   |
| 6.4 | Motor function: tone<br>If abnormal, specify which of the following are present<br><br><b>Multiple responses possible</b>         | Normal..... 1<br>Abnormal: Hypotonia ..... 2<br>Abnormal: Hypertonia..... 3<br>Abnormal: Limited movements ..... 4<br>Abnormal: Uncontrolled movements ..... 5<br>Abnormal: Brudzinski's sign ..... 6                    |
| 6.5 | Motor function: coordination<br>If abnormal, specify which of the following are present<br><br><b>Multiple responses possible</b> | Normal..... 1<br>Abnormal: Change in walking ..... 2<br>Abnormal: Dropping things more than usual ..... 3<br>Abnormal: Spilling fluids more than usual ..... 4                                                           |
| 6.6 | Level of consciousness<br>If abnormal, specify which of the following are present<br><br><b>Multiple responses possible</b>       | Normal..... 1<br>Abnormal: Hyperexcitability..... 2<br>Abnormal: Unresponsiveness..... 3<br>Abnormal: Drowsiness ..... 4<br>Abnormal: Semi-conscious ..... 5<br>Abnormal: Unconscious ..... 6                            |

### 7 MUSCULO-SKELETAL SYSTEM

|     |                                                          |                                                                                                                 |
|-----|----------------------------------------------------------|-----------------------------------------------------------------------------------------------------------------|
| 7.1 | Muscle weakness                                          | Yes ..... 1<br>No ..... 2                                                                                       |
| 7.2 | Bone swellings<br><br><b>Multiple responses possible</b> | Yes: Long bones and joints ..... 1<br>Yes: Ribs ..... 2<br>Yes: Spine ..... 3<br>Yes: Skull..... 4<br>No..... 5 |

## SECTION D

## Referral (identified participants)

### PROVISIONAL DIAGNOSIS

|                                               |                              |        |              |                          |                  |
|-----------------------------------------------|------------------------------|--------|--------------|--------------------------|------------------|
| Clinical impression/<br>provisional diagnosis |                              |        |              |                          |                  |
|                                               |                              |        |              |                          |                  |
|                                               |                              |        |              |                          |                  |
| Referral to (please tick)                     | GP / Private<br>Practitioner | Clinic | Day hospital | Other public<br>hospital | Private hospital |
| Referral letter given                         |                              |        |              | Yes..... 1               | No..... 2        |

## SECTION E

## Blood pressure and pulse rate (participants 8yrs and older)

| Measurement type   | Recorded measurements  |                        |                        | Final Blood Pressure   |
|--------------------|------------------------|------------------------|------------------------|------------------------|
| 1 Systolic (mmHg)  | 1 <input type="text"/> | 2 <input type="text"/> | 3 <input type="text"/> | 4 <input type="text"/> |
| 2 Diastolic (mmHg) | 1 <input type="text"/> | 2 <input type="text"/> | 3 <input type="text"/> | 4 <input type="text"/> |
| 3 PULSE RATE (bpm) | 1 <input type="text"/> | 2 <input type="text"/> | 3 <input type="text"/> | 4 <input type="text"/> |

## SECTION F

## Step fitness test (participants aged 18-40 years)

*Note: Participants can be excluded from this test on clinical grounds.*

|   |                                              |                                                               |
|---|----------------------------------------------|---------------------------------------------------------------|
| 1 | Was the step test performed?                 | Yes..... 1<br>No..... 2                                       |
| 2 | If the test was not done, specify the reason | Cardiac..... 1<br>Respiratory..... 2<br>Other..... 3<br>..... |
| 3 | AGE                                          | <input type="text"/>                                          |
| 4 | MAX PULSE RATE FOR AGE (from the table)      | <input type="text"/>                                          |
| 5 | PULSE RATE (bpm)                             | <input type="text"/>                                          |
| 6 | Systolic (mmHg) (POST EXERCISE)              | <input type="text"/>                                          |
| 7 | Diastolic (mmHg) (POST EXERCISE)             | <input type="text"/>                                          |

Doctor

End time

H H : M M

# INSTRUCTIONS

## Section G to be completed by the Clinic Assistant

Clinic Assistant

Start time

H H : M M

### SECTION G

### Anthropometry

| Measurement type                                             | Unit | Recorded measurements |                      |                                |
|--------------------------------------------------------------|------|-----------------------|----------------------|--------------------------------|
| 1 <b>Weight</b><br>(all participants)                        | kg   | 1                     | <input type="text"/> | <input type="text"/>           |
|                                                              |      | 2                     | <input type="text"/> | <input type="text"/>           |
|                                                              |      | 3                     | <input type="text"/> | <input type="text"/>           |
|                                                              |      | 4                     | <input type="text"/> | <input type="text"/>           |
|                                                              |      | 5                     | <input type="text"/> | <input type="text"/>           |
|                                                              |      |                       |                      | Unable to obtain a measurement |
| 2 <b>Height</b><br>(all participants)                        | cm   | 1                     | <input type="text"/> | <input type="text"/>           |
|                                                              |      | 2                     | <input type="text"/> | <input type="text"/>           |
|                                                              |      | 3                     | <input type="text"/> | <input type="text"/>           |
|                                                              |      | 4                     | <input type="text"/> | <input type="text"/>           |
|                                                              |      | 5                     | <input type="text"/> | <input type="text"/>           |
|                                                              |      |                       |                      | Unable to obtain a measurement |
| 3 <b>Mid upper arm circumference</b><br>(3 months and older) | cm   | 1                     | <input type="text"/> | <input type="text"/>           |
|                                                              |      | 2                     | <input type="text"/> | <input type="text"/>           |
|                                                              |      | 3                     | <input type="text"/> | <input type="text"/>           |
|                                                              |      | 4                     | <input type="text"/> | <input type="text"/>           |
|                                                              |      | 5                     | <input type="text"/> | <input type="text"/>           |
|                                                              |      |                       |                      | Unable to obtain a measurement |
| 4 <b>Triceps Skinfold</b><br>(3 months and older)            | cm   | 1                     | <input type="text"/> | <input type="text"/>           |
|                                                              |      | 2                     | <input type="text"/> | <input type="text"/>           |
|                                                              |      | 3                     | <input type="text"/> | <input type="text"/>           |
|                                                              |      | 4                     | <input type="text"/> | <input type="text"/>           |
|                                                              |      | 5                     | <input type="text"/> | <input type="text"/>           |
|                                                              |      |                       |                      | Unable to obtain a measurement |
| 5 <b>Sub scapular Skinfold</b><br>(3 months and older)       | cm   | 1                     | <input type="text"/> | <input type="text"/>           |
|                                                              |      | 2                     | <input type="text"/> | <input type="text"/>           |
|                                                              |      | 3                     | <input type="text"/> | <input type="text"/>           |
|                                                              |      | 4                     | <input type="text"/> | <input type="text"/>           |
|                                                              |      | 5                     | <input type="text"/> | <input type="text"/>           |
|                                                              |      |                       |                      | Unable to obtain a measurement |
| 6 <b>Biceps Skinfold</b><br>(18 years and older)             | cm   | 1                     | <input type="text"/> | <input type="text"/>           |
|                                                              |      | 2                     | <input type="text"/> | <input type="text"/>           |
|                                                              |      | 3                     | <input type="text"/> | <input type="text"/>           |
|                                                              |      | 4                     | <input type="text"/> | <input type="text"/>           |
|                                                              |      | 5                     | <input type="text"/> | <input type="text"/>           |
|                                                              |      |                       |                      | Unable to obtain a measurement |
| 7 <b>Supra-iliac Skinfold</b><br>(18 years and older)        | cm   | 1                     | <input type="text"/> | <input type="text"/>           |
|                                                              |      | 2                     | <input type="text"/> | <input type="text"/>           |
|                                                              |      | 3                     | <input type="text"/> | <input type="text"/>           |
|                                                              |      | 4                     | <input type="text"/> | <input type="text"/>           |
|                                                              |      | 5                     | <input type="text"/> | <input type="text"/>           |
|                                                              |      |                       |                      | Unable to obtain a measurement |
| 8 <b>Waist circumference</b><br>(3 months and older)         | cm   | 1                     | <input type="text"/> | <input type="text"/>           |
|                                                              |      | 2                     | <input type="text"/> | <input type="text"/>           |
|                                                              |      | 3                     | <input type="text"/> | <input type="text"/>           |
|                                                              |      | 4                     | <input type="text"/> | <input type="text"/>           |
|                                                              |      | 5                     | <input type="text"/> | <input type="text"/>           |
|                                                              |      |                       |                      | Unable to obtain a measurement |
| 9 <b>Hip circumference</b><br>(3 months and older)           | cm   | 1                     | <input type="text"/> | <input type="text"/>           |
|                                                              |      | 2                     | <input type="text"/> | <input type="text"/>           |
|                                                              |      | 3                     | <input type="text"/> | <input type="text"/>           |
|                                                              |      | 4                     | <input type="text"/> | <input type="text"/>           |
|                                                              |      | 5                     | <input type="text"/> | <input type="text"/>           |
|                                                              |      |                       |                      | Unable to obtain a measurement |

Clinic Assistant

End time

H H : M M

|                     |                                                    |
|---------------------|----------------------------------------------------|
| <b>INSTRUCTIONS</b> | <b>Sections H – J to be completed by the Nurse</b> |
|---------------------|----------------------------------------------------|

|       |            |   |   |   |   |   |
|-------|------------|---|---|---|---|---|
| Nurse | Start time | H | H | : | M | M |
|-------|------------|---|---|---|---|---|

|                  |                                       |
|------------------|---------------------------------------|
| <b>SECTION H</b> | <b>Spirometry ( 18 yrs and older)</b> |
|------------------|---------------------------------------|

**Note:** Participants can be excluded from this test on clinical grounds (eg. asthma)

|   |                                              |                                                   |
|---|----------------------------------------------|---------------------------------------------------|
| 1 | Was the spirometry test performed?           | Yes..... 1<br>No..... 2                           |
| 2 | If the test was not done, specify the reason | Asthma ..... 1<br>Other (specify)..... 2<br>..... |

**Please record the following:**

|                  |                                                                                                                                                                         |             |                                                                                                                 |                |                                                                                                                                                                         |
|------------------|-------------------------------------------------------------------------------------------------------------------------------------------------------------------------|-------------|-----------------------------------------------------------------------------------------------------------------|----------------|-------------------------------------------------------------------------------------------------------------------------------------------------------------------------|
| Temperature (°C) | <input style="width: 20px; height: 20px;" type="text"/> <input style="width: 20px; height: 20px;" type="text"/> <input style="width: 20px; height: 20px;" type="text"/> | Humidity(%) | <input style="width: 20px; height: 20px;" type="text"/> <input style="width: 20px; height: 20px;" type="text"/> | Pressure (hPa) | <input style="width: 20px; height: 20px;" type="text"/> <input style="width: 20px; height: 20px;" type="text"/> <input style="width: 20px; height: 20px;" type="text"/> |
|------------------|-------------------------------------------------------------------------------------------------------------------------------------------------------------------------|-------------|-----------------------------------------------------------------------------------------------------------------|----------------|-------------------------------------------------------------------------------------------------------------------------------------------------------------------------|

| Measurement | Units | Recorded measurements                                     |                                                           |                                                           | Final Measurement                                         |
|-------------|-------|-----------------------------------------------------------|-----------------------------------------------------------|-----------------------------------------------------------|-----------------------------------------------------------|
| 3           | L     | 1 <input style="width: 40px; height: 20px;" type="text"/> | 2 <input style="width: 40px; height: 20px;" type="text"/> | 3 <input style="width: 40px; height: 20px;" type="text"/> | 4 <input style="width: 40px; height: 20px;" type="text"/> |
| 4           | L     | 1 <input style="width: 40px; height: 20px;" type="text"/> | 2 <input style="width: 40px; height: 20px;" type="text"/> | 3 <input style="width: 40px; height: 20px;" type="text"/> | 4 <input style="width: 40px; height: 20px;" type="text"/> |
| 5           | L     | 1 <input style="width: 40px; height: 20px;" type="text"/> | 2 <input style="width: 40px; height: 20px;" type="text"/> | 3 <input style="width: 40px; height: 20px;" type="text"/> | 4 <input style="width: 40px; height: 20px;" type="text"/> |
| 6           | L     | 1 <input style="width: 40px; height: 20px;" type="text"/> | 2 <input style="width: 40px; height: 20px;" type="text"/> | 3 <input style="width: 40px; height: 20px;" type="text"/> | 4 <input style="width: 40px; height: 20px;" type="text"/> |

|                  |                                                   |
|------------------|---------------------------------------------------|
| <b>SECTION I</b> | <b>Bioelectrical impedance (18 yrs and older)</b> |
|------------------|---------------------------------------------------|

**Note:** Participants can be excluded from this test on clinical grounds  
**Note:** Variations in body composition may occur in patients pre-menstrually, during menstruation, with renal failure, on some prescription medications (particularly Diuretics) and other conditions causing water retention or water loss

|   |                                                 |                                                                                                                                                     |
|---|-------------------------------------------------|-----------------------------------------------------------------------------------------------------------------------------------------------------|
| 1 | Was the bioelectrical impedance test performed? | Yes..... 1<br>No..... 2                                                                                                                             |
| 2 | If the test was not done, specify the reason    | Pace maker ..... 1<br>Artificial limbs/joints ..... 2<br>Hearing aid..... 3<br>Diuretics ..... 4<br>Alcohol consumed..... 5<br>Full bladder ..... 6 |

| Measurement | Units | Recorded measurements                                     |                                                           |                                                           | Final Measurement                                         |
|-------------|-------|-----------------------------------------------------------|-----------------------------------------------------------|-----------------------------------------------------------|-----------------------------------------------------------|
| 3           | ohms  | 1 <input style="width: 40px; height: 20px;" type="text"/> | 2 <input style="width: 40px; height: 20px;" type="text"/> | 3 <input style="width: 40px; height: 20px;" type="text"/> | 4 <input style="width: 40px; height: 20px;" type="text"/> |

**SECTION J**

**Blood collection**

| No. | Biomarkers          | Respondent category (age)               | Specimen Collected                                                             |
|-----|---------------------|-----------------------------------------|--------------------------------------------------------------------------------|
| 1   | Full blood count    | 2 years and older                       | Yes.....1<br>No .....2<br>Missing value – failure to collect a specimen .....3 |
| 2   | Cholesterol (total) | 6 years and older                       | Yes.....1<br>No .....2<br>Missing value – failure to collect a specimen .....3 |
| 3   | HDL                 | 6 years and older                       | Yes.....1<br>No .....2<br>Missing value – failure to collect a specimen .....3 |
| 4   | LDL                 | 6 years and older                       | Yes.....1<br>No .....2<br>Missing value – failure to collect a specimen .....3 |
| 5   | Triglycerides       | 6 years and older                       | Yes.....1<br>No .....2<br>Missing value – failure to collect a specimen .....3 |
| 6   | Glucose (plasma)    | 6 years and older                       | Yes.....1<br>No .....2<br>Missing value – failure to collect a specimen .....3 |
| 7   | C-reactive protein  | 6 years and older                       | Yes.....1<br>No .....2<br>Missing value – failure to collect a specimen .....3 |
| 8   | Cotinine            | 10 years and older                      | Yes.....1<br>No .....2<br>Missing value – failure to collect a specimen .....3 |
| 9   | Zinc status         | 0 – 5 years, and<br>women 16 – 35 years | Yes.....1<br>No .....2<br>Missing value – failure to collect a specimen .....3 |
| 10  | Vitamin A status    | 0 – 5 years, and<br>women 16 – 35 years | Yes.....1<br>No .....2<br>Missing value – failure to collect a specimen .....3 |
| 11  | Iron status         | 0 – 5 years, and<br>women 16 – 35 years | Yes.....1<br>No .....2<br>Missing value – failure to collect a specimen .....3 |

Nurse

End time

|   |   |   |   |   |
|---|---|---|---|---|
| H | H | : | M | M |
|---|---|---|---|---|
