# Supplementary material for: Eye care utilization pattern in South Africa: results from SANHANES-1
Source: PubMed Central journal article supplement (PMC7430111; doi:10.1186/s12913-020-05621-8), 2020-08-17
Supplement: 12913_2020_5621_MOESM3_ESM.pdf [file 12913_2020_5621_MOESM3_ESM.pdf]

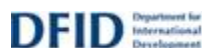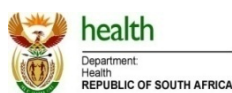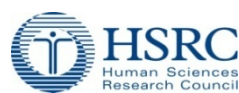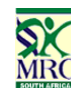

## THE SOUTH AFRICAN NATIONAL HEALTH AND NUTRITION EXAMINATION SURVEY, 2011/2012 (SANHANES-1)

### Visiting Point Questionnaire

#### A. Geographic Particulars

|                                             |  |  |  |  |   |   |     |
|---------------------------------------------|--|--|--|--|---|---|-----|
| Province                                    |  |  |  |  |   |   |     |
| Enumerator area (EA)                        |  |  |  |  |   |   |     |
| Visiting point (VP) number (taken from map) |  |  |  |  |   |   |     |
| Visiting point (VP) address                 |  |  |  |  | C | O | D E |

#### B. Number of Households at Visiting Point

Draw a diagram of the visiting point / stand. If more than one household is present, indicate how many separate households are resident at this visiting point. Allocate a number to each household and use the Kish grid to select only one household

Number of households at visiting point   

The assigned 'number' of the selected household   

#### C. Interview Details

|              | Year | Month | Day | Time code | Response code |
|--------------|------|-------|-----|-----------|---------------|
| First visit  | 2012 |       |     |           |               |
| Second visit | 2012 |       |     |           |               |
| Third visit  | 2012 |       |     |           |               |
| Fourth visit | 2012 |       |     |           |               |
| Fifth visit  | 2012 |       |     |           |               |

**Final response code**

| Time code              | Response code                                               |                                               |
|------------------------|-------------------------------------------------------------|-----------------------------------------------|
| 1 = Morning till 12h00 | 1 = Interview completed                                     | 6 = No one at home                            |
| 2 = 12h01-15h00        | 2 = Interview partly completed and another appointment made | 7 = No one at home for duration of the survey |
| 3 = 15h01-18h00        | 3 = Appointment made for interview                          | 8 = Refusal by household head                 |
| 4 = 18h01-21h00        | 4 = Not a valid visiting point                              | 9 = No one to consent (specify).....          |
| 5 = 21h01 and later    | 5 = No one living here (unoccupied)                         | 10 = Incapacitated (specify).....             |
|                        |                                                             | 11 = Other (Specify) .....                    |

|             |              |  |  |  |  |  |  |
|-------------|--------------|--|--|--|--|--|--|
| Fieldworker | Name         |  |  |  |  |  |  |
|             | Staff number |  |  |  |  |  |  |

|                          |   |   |   |   |   |
|--------------------------|---|---|---|---|---|
| Interview starting time: | H | H | : | M | M |
|--------------------------|---|---|---|---|---|

**1 INSTRUCTION TO INTERVIEWER**

List the persons who usually live in your household (sleep in your household for at least four nights a week) starting with the head of household.

**SECTION A HOUSEHOLD MEMBERS AND THEIR CHARACTERISTICS**

| PERSON NO. | PERSON NAME | AGE                                                | SEX                       | RELATIONSHIP                                                                                                                                                                                                                                                                                                                 | MARITAL STATUS                                                                                                             | SPOUSE / PARTNER                                                                                                                                         | RACE                                                                      | INDIVIDUAL QUESTIONNAIRE NUMBER                                                         |
|------------|-------------|----------------------------------------------------|---------------------------|------------------------------------------------------------------------------------------------------------------------------------------------------------------------------------------------------------------------------------------------------------------------------------------------------------------------------|----------------------------------------------------------------------------------------------------------------------------|----------------------------------------------------------------------------------------------------------------------------------------------------------|---------------------------------------------------------------------------|-----------------------------------------------------------------------------------------|
|            |             | How old is (name)?<br><br>Write 00 if under 1 year | Is (name) male or female? | What is (name's) relationship to the head of the household?                                                                                                                                                                                                                                                                  | What is (name's) PRESENT marital status?<br><br>If code 03-06 - go to q8                                                   | Who in this household is (name's) spouse or partner?<br><br>Write the person no. of the spouse / partner. Write 98 if he/she does not live in the h/hold | How would (name) describe him / herself in terms of race                  | <b>FOR FIELDWORKER USE ONLY</b><br><br>Complete once all individual interviews are done |
| <b>(1)</b> | <b>(2)</b>  | <b>(3)</b>                                         | <b>(4)</b>                | <b>(5)</b>                                                                                                                                                                                                                                                                                                                   | <b>(6)</b>                                                                                                                 | <b>(7)</b>                                                                                                                                               | <b>(8)</b>                                                                | <b>(9)</b>                                                                              |
|            |             | In years                                           | M F                       |                                                                                                                                                                                                                                                                                                                              |                                                                                                                            |                                                                                                                                                          |                                                                           |                                                                                         |
| 1          |             | <input type="text"/>                               | 1 2                       | <input type="text"/>                                                                                                                                                                                                                                                                                                         | <input type="text"/>                                                                                                       | <input type="text"/>                                                                                                                                     | <input type="text"/>                                                      | <input type="text"/>                                                                    |
| 2          |             | <input type="text"/>                               | 1 2                       | <input type="text"/>                                                                                                                                                                                                                                                                                                         | <input type="text"/>                                                                                                       | <input type="text"/>                                                                                                                                     | <input type="text"/>                                                      | <input type="text"/>                                                                    |
| 3          |             | <input type="text"/>                               | 1 2                       | <input type="text"/>                                                                                                                                                                                                                                                                                                         | <input type="text"/>                                                                                                       | <input type="text"/>                                                                                                                                     | <input type="text"/>                                                      | <input type="text"/>                                                                    |
| 4          |             | <input type="text"/>                               | 1 2                       | <input type="text"/>                                                                                                                                                                                                                                                                                                         | <input type="text"/>                                                                                                       | <input type="text"/>                                                                                                                                     | <input type="text"/>                                                      | <input type="text"/>                                                                    |
| 5          |             | <input type="text"/>                               | 1 2                       | <input type="text"/>                                                                                                                                                                                                                                                                                                         | <input type="text"/>                                                                                                       | <input type="text"/>                                                                                                                                     | <input type="text"/>                                                      | <input type="text"/>                                                                    |
| 6          |             | <input type="text"/>                               | 1 2                       | <input type="text"/>                                                                                                                                                                                                                                                                                                         | <input type="text"/>                                                                                                       | <input type="text"/>                                                                                                                                     | <input type="text"/>                                                      | <input type="text"/>                                                                    |
| 7          |             | <input type="text"/>                               | 1 2                       | <input type="text"/>                                                                                                                                                                                                                                                                                                         | <input type="text"/>                                                                                                       | <input type="text"/>                                                                                                                                     | <input type="text"/>                                                      | <input type="text"/>                                                                    |
| 8          |             | <input type="text"/>                               | 1 2                       | <input type="text"/>                                                                                                                                                                                                                                                                                                         | <input type="text"/>                                                                                                       | <input type="text"/>                                                                                                                                     | <input type="text"/>                                                      | <input type="text"/>                                                                    |
| 9          |             | <input type="text"/>                               | 1 2                       | <input type="text"/>                                                                                                                                                                                                                                                                                                         | <input type="text"/>                                                                                                       | <input type="text"/>                                                                                                                                     | <input type="text"/>                                                      | <input type="text"/>                                                                    |
| 10         |             | <input type="text"/>                               | 1 2                       | <input type="text"/>                                                                                                                                                                                                                                                                                                         | <input type="text"/>                                                                                                       | <input type="text"/>                                                                                                                                     | <input type="text"/>                                                      | <input type="text"/>                                                                    |
|            |             |                                                    |                           | 01 = Head/Acting head<br>02 = Wife/husband/<br>partner<br>03 = Son/daughter<br>04 = Son/daughter in law<br>05 = Grandchild<br>06 = Mother/father<br>07 = Mother/father in law<br>08 = Brother/sister<br>09 = Niece/nephew<br>10 = Other relative<br>11 = Adopted/foster/<br>stepchild<br>12 = Not related<br>13 = Don't know | 1 = Married<br>2 = Living together<br>3 = Never married<br>4 = Widowed<br>5 = Separated<br>6 = Divorced<br>7 = Civil Union |                                                                                                                                                          | 1 = African<br>2 = White<br>3 = Coloured<br>4 = Indian/Asian<br>5 = Other |                                                                                         |

# SECTION A HOUSEHOLD MEMBERS AND THEIR CHARACTERISTICS

| PERSON NO. | LANGUAGE                                                                                                                                                                                                                                     | SCHOOL ATTENDANCE                                                                                                                                               | LEVEL OF EDUCATION                                                                                                                                                                                                                                                   |                                                                                                                                                                                                                                                                                                                                               | PRESENT EMPLOYMENT                                                                                                                                                                                                                                                                                                                                                                                                                                                                                                                                                                                                            |
|------------|----------------------------------------------------------------------------------------------------------------------------------------------------------------------------------------------------------------------------------------------|-----------------------------------------------------------------------------------------------------------------------------------------------------------------|----------------------------------------------------------------------------------------------------------------------------------------------------------------------------------------------------------------------------------------------------------------------|-----------------------------------------------------------------------------------------------------------------------------------------------------------------------------------------------------------------------------------------------------------------------------------------------------------------------------------------------|-------------------------------------------------------------------------------------------------------------------------------------------------------------------------------------------------------------------------------------------------------------------------------------------------------------------------------------------------------------------------------------------------------------------------------------------------------------------------------------------------------------------------------------------------------------------------------------------------------------------------------|
|            | Language spoken most often at home                                                                                                                                                                                                           | Does (name) currently attend an educational institution?<br>Attendance includes all part time and full time studies, whether in person or as a distance learner | What is the highest level of education that (name) has completed?                                                                                                                                                                                                    |                                                                                                                                                                                                                                                                                                                                               | How would you describe (name's) present employment situation?                                                                                                                                                                                                                                                                                                                                                                                                                                                                                                                                                                 |
| <b>(1)</b> | <b>(10)</b>                                                                                                                                                                                                                                  | <b>(11)</b>                                                                                                                                                     | <b>(12)</b>                                                                                                                                                                                                                                                          |                                                                                                                                                                                                                                                                                                                                               | <b>(13)</b>                                                                                                                                                                                                                                                                                                                                                                                                                                                                                                                                                                                                                   |
|            |                                                                                                                                                                                                                                              | (Only ages 5-24)                                                                                                                                                | (Only persons aged 7 and older)                                                                                                                                                                                                                                      |                                                                                                                                                                                                                                                                                                                                               | (Only persons aged 18- 64)                                                                                                                                                                                                                                                                                                                                                                                                                                                                                                                                                                                                    |
| 1          | <input type="text"/>                                                                                                                                                                                                                         | <input type="checkbox"/>                                                                                                                                        | <input type="text"/>                                                                                                                                                                                                                                                 |                                                                                                                                                                                                                                                                                                                                               | <input type="text"/>                                                                                                                                                                                                                                                                                                                                                                                                                                                                                                                                                                                                          |
| 2          | <input type="text"/>                                                                                                                                                                                                                         | <input type="checkbox"/>                                                                                                                                        | <input type="text"/>                                                                                                                                                                                                                                                 |                                                                                                                                                                                                                                                                                                                                               | <input type="text"/>                                                                                                                                                                                                                                                                                                                                                                                                                                                                                                                                                                                                          |
| 3          | <input type="text"/>                                                                                                                                                                                                                         | <input type="checkbox"/>                                                                                                                                        | <input type="text"/>                                                                                                                                                                                                                                                 |                                                                                                                                                                                                                                                                                                                                               | <input type="text"/>                                                                                                                                                                                                                                                                                                                                                                                                                                                                                                                                                                                                          |
| 4          | <input type="text"/>                                                                                                                                                                                                                         | <input type="checkbox"/>                                                                                                                                        | <input type="text"/>                                                                                                                                                                                                                                                 |                                                                                                                                                                                                                                                                                                                                               | <input type="text"/>                                                                                                                                                                                                                                                                                                                                                                                                                                                                                                                                                                                                          |
| 5          | <input type="text"/>                                                                                                                                                                                                                         | <input type="checkbox"/>                                                                                                                                        | <input type="text"/>                                                                                                                                                                                                                                                 |                                                                                                                                                                                                                                                                                                                                               | <input type="text"/>                                                                                                                                                                                                                                                                                                                                                                                                                                                                                                                                                                                                          |
| 6          | <input type="text"/>                                                                                                                                                                                                                         | <input type="checkbox"/>                                                                                                                                        | <input type="text"/>                                                                                                                                                                                                                                                 |                                                                                                                                                                                                                                                                                                                                               | <input type="text"/>                                                                                                                                                                                                                                                                                                                                                                                                                                                                                                                                                                                                          |
| 7          | <input type="text"/>                                                                                                                                                                                                                         | <input type="checkbox"/>                                                                                                                                        | <input type="text"/>                                                                                                                                                                                                                                                 |                                                                                                                                                                                                                                                                                                                                               | <input type="text"/>                                                                                                                                                                                                                                                                                                                                                                                                                                                                                                                                                                                                          |
| 8          | <input type="text"/>                                                                                                                                                                                                                         | <input type="checkbox"/>                                                                                                                                        | <input type="text"/>                                                                                                                                                                                                                                                 |                                                                                                                                                                                                                                                                                                                                               | <input type="text"/>                                                                                                                                                                                                                                                                                                                                                                                                                                                                                                                                                                                                          |
| 9          | <input type="text"/>                                                                                                                                                                                                                         | <input type="checkbox"/>                                                                                                                                        | <input type="text"/>                                                                                                                                                                                                                                                 |                                                                                                                                                                                                                                                                                                                                               | <input type="text"/>                                                                                                                                                                                                                                                                                                                                                                                                                                                                                                                                                                                                          |
| 10         | <input type="text"/>                                                                                                                                                                                                                         | <input type="checkbox"/>                                                                                                                                        | <input type="text"/>                                                                                                                                                                                                                                                 |                                                                                                                                                                                                                                                                                                                                               | <input type="text"/>                                                                                                                                                                                                                                                                                                                                                                                                                                                                                                                                                                                                          |
|            | 01 = Afrikaans<br>02 = English<br>03 = Isindebele<br>04 = Isiwati<br>05 = Isixhosa<br>06 = Isizulu<br>07 = Sesotho<br>08 = Sepedi<br>09 = Setswana<br>10 = Tshivenda<br>11 = Xitsonga<br>12 = Other African<br>13 = Other European/<br>Asian | 1 = Yes<br>2 = No<br>3 = Don't know                                                                                                                             | 98 = No schooling<br>00 = Grade R/Pre-school<br>01 = Grade 1/ Sub A<br>02 = Grade 2/ Sub B<br>03 = Grade 3/ STD 1/ ABET 1<br>04 = Grade 4/ STD 2<br>05 = Grade 5/ STD 3/ ABET 2<br>06 = Grade 6/ STD 4<br>07 = Grade 7/ STD 5/ ABET 3<br>08 = Grade 8/ STD 6/ Form 1 | 09 = Grade 9/ STD 7/ABET 4/Form 2<br>10 = Grade 10/ STD 8/ Form 3<br>11 = Grade 11/ STD 9/ Form 4<br>12 = Grade 12/ STD 10/ Form 5<br>13 = NTC Level 2 - 4<br>14 = NTC 4/ N4 - NTC 6/ N6<br>15 = Certificate/Diploma with less than Grade 12/ STD 10<br>16 = Certificate / Diploma with Grade 12/ STD 10<br>17 = Higher Degrees<br>18 = Other | 01 = Housewife, homemaker, not looking for work<br>02 = Housewife, homemaker, looking for work<br>03 = Unemployed, looking for work<br>04 = Unemployed, not looking for work<br>05 = Work in informal sector, not looking for permanent work<br>06 = Sick/ disabled and unable to work<br>07 = Student/pupil/learner<br>08 = Self-employed - Full time (40 hrs or more per week)<br>09 = Self-employed - Part time (less than 40 hrs per week)<br>10 = Employed - Part time (less than 40 hrs per week)<br>11 = Employed - Full time (40 hrs or more per week)<br>12 = Employed (Seasonal Work)<br>13 = Retired<br>14 = Other |

**SECTION A**

**Continuation if more than 10 people in the household**

| PERSON NO. | PERSON NAME | AGE                                                | SEX                       | RELATIONSHIP                                                                                                                                                                                                                                                                                                                 | MARITAL STATUS                                                                                                             | SPOUSE / PARTNER                                                                                                                                         | RACE                                                                      | INDIVIDUAL QUESTIONNAIRE NUMBER                                                         |
|------------|-------------|----------------------------------------------------|---------------------------|------------------------------------------------------------------------------------------------------------------------------------------------------------------------------------------------------------------------------------------------------------------------------------------------------------------------------|----------------------------------------------------------------------------------------------------------------------------|----------------------------------------------------------------------------------------------------------------------------------------------------------|---------------------------------------------------------------------------|-----------------------------------------------------------------------------------------|
|            |             | How old is (name)?<br><br>Write 00 if under 1 year | Is (name) male or female? | What is (name's) relationship to the head of the household?                                                                                                                                                                                                                                                                  | What is (name's) PRESENT marital status?<br><br>If code 03-06 - go to q8                                                   | Who in this household is (name's) spouse or partner?<br><br>Write the person no. of the spouse / partner. Write 98 if he/she does not live in the h/hold | How would (name) describe him / herself in terms of race                  | <b>FOR FIELDWORKER USE ONLY</b><br><br>Complete once all individual interviews are done |
| <b>(1)</b> | <b>(2)</b>  | <b>(3)</b>                                         | <b>(4)</b>                | <b>(5)</b>                                                                                                                                                                                                                                                                                                                   | <b>(6)</b>                                                                                                                 | <b>(7)</b>                                                                                                                                               | <b>(8)</b>                                                                | <b>(9)</b>                                                                              |
|            |             | In years                                           | M F                       |                                                                                                                                                                                                                                                                                                                              |                                                                                                                            |                                                                                                                                                          |                                                                           |                                                                                         |
| 11         |             | <input type="text"/>                               | 1 2                       | <input type="text"/>                                                                                                                                                                                                                                                                                                         | <input type="text"/>                                                                                                       | <input type="text"/>                                                                                                                                     | <input type="text"/>                                                      | <input type="text"/>                                                                    |
| 12         |             | <input type="text"/>                               | 1 2                       | <input type="text"/>                                                                                                                                                                                                                                                                                                         | <input type="text"/>                                                                                                       | <input type="text"/>                                                                                                                                     | <input type="text"/>                                                      | <input type="text"/>                                                                    |
| 13         |             | <input type="text"/>                               | 1 2                       | <input type="text"/>                                                                                                                                                                                                                                                                                                         | <input type="text"/>                                                                                                       | <input type="text"/>                                                                                                                                     | <input type="text"/>                                                      | <input type="text"/>                                                                    |
| 14         |             | <input type="text"/>                               | 1 2                       | <input type="text"/>                                                                                                                                                                                                                                                                                                         | <input type="text"/>                                                                                                       | <input type="text"/>                                                                                                                                     | <input type="text"/>                                                      | <input type="text"/>                                                                    |
| 15         |             | <input type="text"/>                               | 1 2                       | <input type="text"/>                                                                                                                                                                                                                                                                                                         | <input type="text"/>                                                                                                       | <input type="text"/>                                                                                                                                     | <input type="text"/>                                                      | <input type="text"/>                                                                    |
| 16         |             | <input type="text"/>                               | 1 2                       | <input type="text"/>                                                                                                                                                                                                                                                                                                         | <input type="text"/>                                                                                                       | <input type="text"/>                                                                                                                                     | <input type="text"/>                                                      | <input type="text"/>                                                                    |
| 17         |             | <input type="text"/>                               | 1 2                       | <input type="text"/>                                                                                                                                                                                                                                                                                                         | <input type="text"/>                                                                                                       | <input type="text"/>                                                                                                                                     | <input type="text"/>                                                      | <input type="text"/>                                                                    |
| 18         |             | <input type="text"/>                               | 1 2                       | <input type="text"/>                                                                                                                                                                                                                                                                                                         | <input type="text"/>                                                                                                       | <input type="text"/>                                                                                                                                     | <input type="text"/>                                                      | <input type="text"/>                                                                    |
| 19         |             | <input type="text"/>                               | 1 2                       | <input type="text"/>                                                                                                                                                                                                                                                                                                         | <input type="text"/>                                                                                                       | <input type="text"/>                                                                                                                                     | <input type="text"/>                                                      | <input type="text"/>                                                                    |
| 20         |             | <input type="text"/>                               | 1 2                       | <input type="text"/>                                                                                                                                                                                                                                                                                                         | <input type="text"/>                                                                                                       | <input type="text"/>                                                                                                                                     | <input type="text"/>                                                      | <input type="text"/>                                                                    |
|            |             |                                                    |                           | 01 = Head/Acting head<br>02 = Wife/husband/<br>partner<br>03 = Son/daughter<br>04 = Son/daughter in law<br>05 = Grandchild<br>06 = Mother/father<br>07 = Mother/father in law<br>08 = Brother/sister<br>09 = Niece/nephew<br>10 = Other relative<br>11 = Adopted/foster/<br>stepchild<br>12 = Not related<br>13 = Don't know | 1 = Married<br>2 = Living together<br>3 = Never married<br>4 = Widowed<br>5 = Separated<br>6 = Divorced<br>7 = Civil Union |                                                                                                                                                          | 1 = African<br>2 = White<br>3 = Coloured<br>4 = Indian/Asian<br>5 = Other |                                                                                         |

# SECTION A

# Continuation if more than 10 people in the household

| PERSON NO. | LANGUAGE                                                                                                                                                                                                                                     | SCHOOL ATTENDANCE                                                                                                                                               | LEVEL OF EDUCATION                                                                                                                                                                                                                                                   | PRESENT EMPLOYMENT                                                                                                                                                                                                                                                                                                                            |                                                                                                                                                                                                                                                                                                                                                                                                                                                                                                                                                                                                                               |
|------------|----------------------------------------------------------------------------------------------------------------------------------------------------------------------------------------------------------------------------------------------|-----------------------------------------------------------------------------------------------------------------------------------------------------------------|----------------------------------------------------------------------------------------------------------------------------------------------------------------------------------------------------------------------------------------------------------------------|-----------------------------------------------------------------------------------------------------------------------------------------------------------------------------------------------------------------------------------------------------------------------------------------------------------------------------------------------|-------------------------------------------------------------------------------------------------------------------------------------------------------------------------------------------------------------------------------------------------------------------------------------------------------------------------------------------------------------------------------------------------------------------------------------------------------------------------------------------------------------------------------------------------------------------------------------------------------------------------------|
|            | Language spoken most often at home                                                                                                                                                                                                           | Does (name) currently attend an educational institution?<br>Attendance includes all part time and full time studies, whether in person or as a distance learner | What is the highest level of education that (name) has completed)?                                                                                                                                                                                                   | How would you describe (name's) present employment situation?                                                                                                                                                                                                                                                                                 |                                                                                                                                                                                                                                                                                                                                                                                                                                                                                                                                                                                                                               |
| <b>(1)</b> | <b>(10)</b>                                                                                                                                                                                                                                  | <b>(11)</b>                                                                                                                                                     | <b>(12)</b>                                                                                                                                                                                                                                                          | <b>(13)</b>                                                                                                                                                                                                                                                                                                                                   |                                                                                                                                                                                                                                                                                                                                                                                                                                                                                                                                                                                                                               |
|            |                                                                                                                                                                                                                                              | (Only ages 5-24)                                                                                                                                                | (Only persons aged 7 and older)                                                                                                                                                                                                                                      | (Only persons aged 18- 64)                                                                                                                                                                                                                                                                                                                    |                                                                                                                                                                                                                                                                                                                                                                                                                                                                                                                                                                                                                               |
| 11         | <input type="text"/>                                                                                                                                                                                                                         | <input type="checkbox"/>                                                                                                                                        | <input type="text"/>                                                                                                                                                                                                                                                 | <input type="text"/>                                                                                                                                                                                                                                                                                                                          |                                                                                                                                                                                                                                                                                                                                                                                                                                                                                                                                                                                                                               |
| 12         | <input type="text"/>                                                                                                                                                                                                                         | <input type="checkbox"/>                                                                                                                                        | <input type="text"/>                                                                                                                                                                                                                                                 | <input type="text"/>                                                                                                                                                                                                                                                                                                                          |                                                                                                                                                                                                                                                                                                                                                                                                                                                                                                                                                                                                                               |
| 13         | <input type="text"/>                                                                                                                                                                                                                         | <input type="checkbox"/>                                                                                                                                        | <input type="text"/>                                                                                                                                                                                                                                                 | <input type="text"/>                                                                                                                                                                                                                                                                                                                          |                                                                                                                                                                                                                                                                                                                                                                                                                                                                                                                                                                                                                               |
| 14         | <input type="text"/>                                                                                                                                                                                                                         | <input type="checkbox"/>                                                                                                                                        | <input type="text"/>                                                                                                                                                                                                                                                 | <input type="text"/>                                                                                                                                                                                                                                                                                                                          |                                                                                                                                                                                                                                                                                                                                                                                                                                                                                                                                                                                                                               |
| 15         | <input type="text"/>                                                                                                                                                                                                                         | <input type="checkbox"/>                                                                                                                                        | <input type="text"/>                                                                                                                                                                                                                                                 | <input type="text"/>                                                                                                                                                                                                                                                                                                                          |                                                                                                                                                                                                                                                                                                                                                                                                                                                                                                                                                                                                                               |
| 16         | <input type="text"/>                                                                                                                                                                                                                         | <input type="checkbox"/>                                                                                                                                        | <input type="text"/>                                                                                                                                                                                                                                                 | <input type="text"/>                                                                                                                                                                                                                                                                                                                          |                                                                                                                                                                                                                                                                                                                                                                                                                                                                                                                                                                                                                               |
| 17         | <input type="text"/>                                                                                                                                                                                                                         | <input type="checkbox"/>                                                                                                                                        | <input type="text"/>                                                                                                                                                                                                                                                 | <input type="text"/>                                                                                                                                                                                                                                                                                                                          |                                                                                                                                                                                                                                                                                                                                                                                                                                                                                                                                                                                                                               |
| 18         | <input type="text"/>                                                                                                                                                                                                                         | <input type="checkbox"/>                                                                                                                                        | <input type="text"/>                                                                                                                                                                                                                                                 | <input type="text"/>                                                                                                                                                                                                                                                                                                                          |                                                                                                                                                                                                                                                                                                                                                                                                                                                                                                                                                                                                                               |
| 19         | <input type="text"/>                                                                                                                                                                                                                         | <input type="checkbox"/>                                                                                                                                        | <input type="text"/>                                                                                                                                                                                                                                                 | <input type="text"/>                                                                                                                                                                                                                                                                                                                          |                                                                                                                                                                                                                                                                                                                                                                                                                                                                                                                                                                                                                               |
| 20         | <input type="text"/>                                                                                                                                                                                                                         | <input type="checkbox"/>                                                                                                                                        | <input type="text"/>                                                                                                                                                                                                                                                 | <input type="text"/>                                                                                                                                                                                                                                                                                                                          |                                                                                                                                                                                                                                                                                                                                                                                                                                                                                                                                                                                                                               |
|            | 01 = Afrikaans<br>02 = English<br>03 = Isindebele<br>04 = Isiwati<br>05 = Isixhosa<br>06 = Isizulu<br>07 = Sesotho<br>08 = Sepedi<br>09 = Setswana<br>10 = Tshivenda<br>11 = Xitsonga<br>12 = Other African<br>13 = Other European/<br>Asian | 1 = Yes<br>2 = No<br>3 = Don't know                                                                                                                             | 98 = No schooling<br>00 = Grade R/Pre-school<br>01 = Grade 1/ Sub A<br>02 = Grade 2/ Sub B<br>03 = Grade 3/ STD 1/ ABET 1<br>04 = Grade 4/ STD 2<br>05 = Grade 5/ STD 3/ ABET 2<br>06 = Grade 6/ STD 4<br>07 = Grade 7/ STD 5/ ABET 3<br>08 = Grade 8/ STD 6/ Form 1 | 09 = Grade 9/ STD 7/ABET 4/Form 2<br>10 = Grade 10/ STD 8/ Form 3<br>11 = Grade 11/ STD 9/ Form 4<br>12 = Grade 12/ STD 10/ Form 5<br>13 = NTC Level 2 - 4<br>14 = NTC 4/ N4 - NTC 6/ N6<br>15 = Certificate/Diploma with less than Grade 12/ STD 10<br>16 = Certificate / Diploma with Grade 12/ STD 10<br>17 = Higher Degrees<br>18 = Other | 01 = Housewife, homemaker, not looking for work<br>02 = Housewife, homemaker, looking for work<br>03 = Unemployed, looking for work<br>04 = Unemployed, not looking for work<br>05 = Work in informal sector, not looking for permanent work<br>06 = Sick/ disabled and unable to work<br>07 = Student/pupil/learner<br>08 = Self employed – Full time (40 hrs or more per week)<br>09 = Self-employed - Part time (less than 40 hrs per week)<br>10 = Employed - Part time (less than 40 hrs per week)<br>11 = Employed – Full time (40 hrs or more per week)<br>12 = Employed (Seasonal Work)<br>13 = Retired<br>14 = Other |

# SECTION A

# HOUSEHOLD MEMBERS AND THEIR CHARACTERISTICS

| PERSON NO. | OCCUPATION                                                                                                               | SOURCE OF INCOME                                                                                                                                                             | INCOME CATEGORY                                                                                                                                                                                                                                                                                                              |                                                                                                                                                                                                                                                                                                                                                        |
|------------|--------------------------------------------------------------------------------------------------------------------------|------------------------------------------------------------------------------------------------------------------------------------------------------------------------------|------------------------------------------------------------------------------------------------------------------------------------------------------------------------------------------------------------------------------------------------------------------------------------------------------------------------------|--------------------------------------------------------------------------------------------------------------------------------------------------------------------------------------------------------------------------------------------------------------------------------------------------------------------------------------------------------|
|            | What kind of work does (name) usually do in his/her main job/business<br><br>Write a short description of the occupation | What is (name's) main source of income?                                                                                                                                      | What is the income category that best describes (name's) gross monthly / annual income before deductions and including all sources of income?                                                                                                                                                                                |                                                                                                                                                                                                                                                                                                                                                        |
| <b>(1)</b> | <b>(14)</b>                                                                                                              | <b>(15)</b>                                                                                                                                                                  | <b>(16)</b>                                                                                                                                                                                                                                                                                                                  |                                                                                                                                                                                                                                                                                                                                                        |
|            | (Only persons aged 18- 64)                                                                                               | (Only persons aged 18 years and older)                                                                                                                                       | (Only persons aged 18 years and older)                                                                                                                                                                                                                                                                                       |                                                                                                                                                                                                                                                                                                                                                        |
| 1          |                                                                                                                          | <input type="checkbox"/>                                                                                                                                                     | <input type="text"/>                                                                                                                                                                                                                                                                                                         | <input type="text"/>                                                                                                                                                                                                                                                                                                                                   |
| 2          |                                                                                                                          | <input type="checkbox"/>                                                                                                                                                     | <input type="text"/>                                                                                                                                                                                                                                                                                                         | <input type="text"/>                                                                                                                                                                                                                                                                                                                                   |
| 3          |                                                                                                                          | <input type="checkbox"/>                                                                                                                                                     | <input type="text"/>                                                                                                                                                                                                                                                                                                         | <input type="text"/>                                                                                                                                                                                                                                                                                                                                   |
| 4          |                                                                                                                          | <input type="checkbox"/>                                                                                                                                                     | <input type="text"/>                                                                                                                                                                                                                                                                                                         | <input type="text"/>                                                                                                                                                                                                                                                                                                                                   |
| 5          |                                                                                                                          | <input type="checkbox"/>                                                                                                                                                     | <input type="text"/>                                                                                                                                                                                                                                                                                                         | <input type="text"/>                                                                                                                                                                                                                                                                                                                                   |
| 6          |                                                                                                                          | <input type="checkbox"/>                                                                                                                                                     | <input type="text"/>                                                                                                                                                                                                                                                                                                         | <input type="text"/>                                                                                                                                                                                                                                                                                                                                   |
| 7          |                                                                                                                          | <input type="checkbox"/>                                                                                                                                                     | <input type="text"/>                                                                                                                                                                                                                                                                                                         | <input type="text"/>                                                                                                                                                                                                                                                                                                                                   |
| 8          |                                                                                                                          | <input type="checkbox"/>                                                                                                                                                     | <input type="text"/>                                                                                                                                                                                                                                                                                                         | <input type="text"/>                                                                                                                                                                                                                                                                                                                                   |
| 9          |                                                                                                                          | <input type="checkbox"/>                                                                                                                                                     | <input type="text"/>                                                                                                                                                                                                                                                                                                         | <input type="text"/>                                                                                                                                                                                                                                                                                                                                   |
| 10         |                                                                                                                          | <input type="checkbox"/>                                                                                                                                                     | <input type="text"/>                                                                                                                                                                                                                                                                                                         | <input type="text"/>                                                                                                                                                                                                                                                                                                                                   |
|            |                                                                                                                          | 1 = Salaries and / or wages<br>2 = Remittances<br>3 = Pension/ Grants / UIF<br>4 = Sale of products and services<br>5 = No income<br>6 = Refused to answer<br>7 = Don't know | Monthly<br>01 = no income<br>02 = R1 – R400<br>03 = R401 – R800<br>04 = R801 – R1 600<br>05 = R1 601 – R3 200<br>06 = R3 201 – R6 400<br>07 = R6 401 – R12 800<br>08 = R12 801 – R25 600<br>09 = R25 601 – R51 200<br>10 = R51201 – R102 400<br>11 = R102 401 – R204 800<br>12 = R 204 801 or more<br>13 = Refused to answer | Annual<br>01 = no income<br>02 = R1 – R4 800<br>03 = R4 801 – R9 600<br>04 = R9 601 – R19 200<br>05 = R19 201 – R38 400<br>06 = R38 401 – R76 800<br>07 = R76 801 – R153 600<br>08 = R153 601 – R307 200<br>09 = R307 201 – R614 400<br>10 = R614 401 – R1 228 800<br>11 = R1 228 801 – R2 457 600<br>12 = R 457 601 or more<br>13 = Refused to answer |

**2 INSTRUCTION TO INTERVIEWER** Just to make sure that I have a complete listing: I listed \_\_\_\_\_ persons.  
 Are there any other persons such as small children or infants that we have not listed? Are there any other people who may not be members of your family, such as domestic servants, lodgers or friends who usually sleep here for at least four nights a week?  
**LIST ANY ADDITIONAL MEMBERS IN THE HOUSEHOLD SCHEDULE**

WRITE THE "PERSON NUMBER" OF THE MAIN RESPONDENT WHO PROVIDED THE INFORMATION

DID THE HOUSEHOLD HEAD CONSENT TO FOLLOW UP IN THE FOLLOW UP STUDY  Y  N

**SECTION A**

**Continuation if more than 10 people in the household**

| PERSON NO. | OCCUPATION                                                                                                           | SOURCE OF INCOME                                                                                                                                                             | INCOME CATEGORY                                                                                                                                                                                                                                                                                                               |                                                                                                                                                                                                                                                                                                                                                        |
|------------|----------------------------------------------------------------------------------------------------------------------|------------------------------------------------------------------------------------------------------------------------------------------------------------------------------|-------------------------------------------------------------------------------------------------------------------------------------------------------------------------------------------------------------------------------------------------------------------------------------------------------------------------------|--------------------------------------------------------------------------------------------------------------------------------------------------------------------------------------------------------------------------------------------------------------------------------------------------------------------------------------------------------|
|            | What kind of work does (name) usually do in his/her main job/business<br>Write a short description of the occupation | What is (name's) main source of income?                                                                                                                                      | What is the income category that best describes (name's) gross monthly / annual income before deductions and including all sources of income?                                                                                                                                                                                 |                                                                                                                                                                                                                                                                                                                                                        |
| <b>(1)</b> | <b>(14)</b>                                                                                                          | <b>(15)</b>                                                                                                                                                                  | <b>(16)</b>                                                                                                                                                                                                                                                                                                                   |                                                                                                                                                                                                                                                                                                                                                        |
|            | (Only persons aged 18- 64)                                                                                           | (Only persons aged 18 years and older)                                                                                                                                       | (Only persons aged 18 years and older)                                                                                                                                                                                                                                                                                        |                                                                                                                                                                                                                                                                                                                                                        |
| 11         |                                                                                                                      | <input type="checkbox"/>                                                                                                                                                     | <input type="checkbox"/>                                                                                                                                                                                                                                                                                                      | <input type="checkbox"/>                                                                                                                                                                                                                                                                                                                               |
| 12         |                                                                                                                      | <input type="checkbox"/>                                                                                                                                                     | <input type="checkbox"/>                                                                                                                                                                                                                                                                                                      | <input type="checkbox"/>                                                                                                                                                                                                                                                                                                                               |
| 13         |                                                                                                                      | <input type="checkbox"/>                                                                                                                                                     | <input type="checkbox"/>                                                                                                                                                                                                                                                                                                      | <input type="checkbox"/>                                                                                                                                                                                                                                                                                                                               |
| 14         |                                                                                                                      | <input type="checkbox"/>                                                                                                                                                     | <input type="checkbox"/>                                                                                                                                                                                                                                                                                                      | <input type="checkbox"/>                                                                                                                                                                                                                                                                                                                               |
| 15         |                                                                                                                      | <input type="checkbox"/>                                                                                                                                                     | <input type="checkbox"/>                                                                                                                                                                                                                                                                                                      | <input type="checkbox"/>                                                                                                                                                                                                                                                                                                                               |
| 16         |                                                                                                                      | <input type="checkbox"/>                                                                                                                                                     | <input type="checkbox"/>                                                                                                                                                                                                                                                                                                      | <input type="checkbox"/>                                                                                                                                                                                                                                                                                                                               |
| 17         |                                                                                                                      | <input type="checkbox"/>                                                                                                                                                     | <input type="checkbox"/>                                                                                                                                                                                                                                                                                                      | <input type="checkbox"/>                                                                                                                                                                                                                                                                                                                               |
| 18         |                                                                                                                      | <input type="checkbox"/>                                                                                                                                                     | <input type="checkbox"/>                                                                                                                                                                                                                                                                                                      | <input type="checkbox"/>                                                                                                                                                                                                                                                                                                                               |
| 19         |                                                                                                                      | <input type="checkbox"/>                                                                                                                                                     | <input type="checkbox"/>                                                                                                                                                                                                                                                                                                      | <input type="checkbox"/>                                                                                                                                                                                                                                                                                                                               |
| 20         |                                                                                                                      | <input type="checkbox"/>                                                                                                                                                     | <input type="checkbox"/>                                                                                                                                                                                                                                                                                                      | <input type="checkbox"/>                                                                                                                                                                                                                                                                                                                               |
|            |                                                                                                                      | 1 = Salaries and / or wages<br>2 = Remittances<br>3 = Pension/ Grants / UIF<br>4 = Sale of products and services<br>5 = No income<br>6 = Refused to answer<br>7 = Don't know | Monthly<br>01 = no income<br>02 = R1 – R400<br>03 = R401 – R800<br>04 = R801 – R1 600<br>05 = R1 601 – R3 200<br>06 = R3 201 – R6 400<br>07 = R6 401 – R12 800<br>08 = R12 801 – R25 600<br>09 = R25 601 – R51 200<br>10 = R51 201 – R102 400<br>11 = R102 401 – R204 800<br>12 = R 204 801 or more<br>13 = Refused to answer | Annual<br>01 = no income<br>02 = R1 – R4 800<br>03 = R4 801 – R9 600<br>04 = R9 601 – R19 200<br>05 = R19 201 – R38 400<br>06 = R38 401 – R76 800<br>07 = R76 801 – R153 600<br>08 = R153 601 – R307 200<br>09 = R307 201 – R614 400<br>10 = R614 401 – R1 228 800<br>11 = R1 228 801 – R2 457 600<br>12 = R 457 601 or more<br>13 = Refused to answer |

**2 INSTRUCTION TO INTERVIEWER** Just to make sure that I have a complete listing: I listed \_\_\_\_\_ persons.  
Are there any other persons such as small children or infants that we have not listed? Are there any other people who may not be members of your family, such as domestic servants, lodgers or friends who usually sleep here for at least four nights a week?  
**LIST ANY ADDITIONAL MEMBERS IN THE HOUSEHOLD SCHEDULE**

WRITE THE "PERSON NUMBER" OF THE MAIN RESPONDENT WHO PROVIDED THE INFORMATION

DID THE HOUSEHOLD HEAD CONSENT TO FOLLOW UP IN THE FOLLOW UP STUDY  Y  N

**3 INSTRUCTION TO INTERVIEWER**

Record the answers by circling a response or by writing the answer in the space provided.

Please note that only one response is allowed per question unless another instruction is given.

Please note that coding categories should NOT be read to the participant unless another instruction is given

**SECTION B-1**

**FOOD SECURITY**

| NO.                                                                                                                                                                                             | QUESTIONS AND FILTERS                                                                                                                                                                                                                                                                             | CODING CATEGORIES                                                                                                                                                                                                                                                                                                                                                                                                                                              | SKIP |
|-------------------------------------------------------------------------------------------------------------------------------------------------------------------------------------------------|---------------------------------------------------------------------------------------------------------------------------------------------------------------------------------------------------------------------------------------------------------------------------------------------------|----------------------------------------------------------------------------------------------------------------------------------------------------------------------------------------------------------------------------------------------------------------------------------------------------------------------------------------------------------------------------------------------------------------------------------------------------------------|------|
| <p><b>Access and availability to food has become very topical in South Africa.</b><br/> <b>The next questions measure access and availability of food in households across the country.</b></p> |                                                                                                                                                                                                                                                                                                   |                                                                                                                                                                                                                                                                                                                                                                                                                                                                |      |
| 1                                                                                                                                                                                               | <p>Who is mainly responsible for food preparation?</p>                                                                                                                                                                                                                                            | <p>Name: .....</p> <p>Person No from the household schedule ..... <input type="text"/> <input type="text"/></p>                                                                                                                                                                                                                                                                                                                                                |      |
| 2                                                                                                                                                                                               | <p>Who decides on what types of food are bought for the household?</p>                                                                                                                                                                                                                            | <p>Name: .....</p> <p>Person No from the household schedule ..... <input type="text"/> <input type="text"/></p>                                                                                                                                                                                                                                                                                                                                                |      |
| 3                                                                                                                                                                                               | <p>Who is mainly responsible for feeding / serving the child/children?</p> <p>Multiple responses possible<br/>                     If the person responsible is not listed in the household schedule write '00'<br/>                     If there are no children in the household write '88'</p> | <p>1) Name: .....</p> <p>1) Person No from the household schedule ..... <input type="text"/> <input type="text"/></p> <p>2) Name: .....</p> <p>2) Person No from the household schedule ..... <input type="text"/> <input type="text"/></p>                                                                                                                                                                                                                    |      |
| 4                                                                                                                                                                                               | <p>Who decides how much money is spent on food?</p> <p>Multiple responses possible</p>                                                                                                                                                                                                            | <p>1) Name: .....</p> <p>1) Person No from the household schedule ..... <input type="text"/> <input type="text"/></p> <p>2) Name: .....</p> <p>2) Person No from the household schedule ..... <input type="text"/> <input type="text"/></p>                                                                                                                                                                                                                    |      |
| 5                                                                                                                                                                                               | <p>How much money is spent on food weekly?</p>                                                                                                                                                                                                                                                    | <p>R 0 – R 50 ..... 1<br/>                     R 50 – R 100 ..... 2<br/>                     R 100 – R 150 ..... 3<br/>                     R 150 – R 200 ..... 4<br/>                     R 200 – R 250 ..... 5<br/>                     R 250 – R 300 ..... 6<br/>                     R 300 – R 350 ..... 7<br/>                     R 350 – R 400 ..... 8<br/>                     More than R400 ..... 9<br/>                     Don't know ..... 10</p> |      |



## SECTION B – 2

## HUNGER SCALE

| NO. | QUESTIONS AND FILTERS                                                                                                            | CODING CATEGORIES         | SKIP |
|-----|----------------------------------------------------------------------------------------------------------------------------------|---------------------------|------|
| 6a  | Does your household ever run out of money to buy food?                                                                           | Yes ..... 1<br>No ..... 2 | >7a  |
| 6b  | Has it happened in the past 30 days?                                                                                             | Yes ..... 1<br>No ..... 2 | >7a  |
| 6c  | Has it happened 5 or more days in the past 30 days?                                                                              | Yes ..... 1<br>No ..... 2 |      |
| 7a  | Do you ever rely on a limited number of foods to feed your children because you are running out of money to buy food for a meal? | Yes ..... 1<br>No ..... 2 | >8a  |
| 7b  | Has it happened in the past 30 days?                                                                                             | Yes ..... 1<br>No ..... 2 | >8a  |
| 7c  | Has it happened 5 or more days in the past 30 days?                                                                              | Yes ..... 1<br>No ..... 2 |      |
| 8a  | Do you ever cut the size of meals or skip meals because there is not enough money for food?                                      | Yes ..... 1<br>No ..... 2 | >9a  |
| 8b  | Has it happened in the past 30 days?                                                                                             | Yes ..... 1<br>No ..... 2 | >9a  |
| 8c  | Has it happened 5 or more days in the past 30 days?                                                                              | Yes ..... 1<br>No ..... 2 |      |
| 9a  | Do you ever eat less than you should because there is not enough money for food?                                                 | Yes ..... 1<br>No ..... 2 | >10a |
| 9b  | Has it happened in the past 30 days?                                                                                             | Yes ..... 1<br>No ..... 2 | >10a |
| 9c  | Has it happened 5 or more days in the past 30 days?                                                                              | Yes ..... 1<br>No ..... 2 |      |
| 10a | Do your children ever eat less than you feel they should because there is not enough money for food?                             | Yes ..... 1<br>No ..... 2 | >11a |
| 10b | Has it happened in the past 30 days?                                                                                             | Yes ..... 1<br>No ..... 2 | >11a |
| 10c | Has it happened 5 or more days in the past 30 days?                                                                              | Yes ..... 1<br>No ..... 2 |      |
| 11a | Do your children ever say they are hungry because there is not enough food in the house?                                         | Yes ..... 1<br>No ..... 2 | >12a |
| 11b | Has it happened in the past 30 days?                                                                                             | Yes ..... 1<br>No ..... 2 | >12a |
| 11c | Has it happened 5 or more days in the past 30 days?                                                                              | Yes ..... 1<br>No ..... 2 |      |
| 12a | Do you ever cut the size of your children's meals or do they ever skip meals because there is not enough money to buy food?      | Yes ..... 1<br>No ..... 2 | >13a |
| 12b | Has it happened in the past 30 days?                                                                                             | Yes ..... 1<br>No ..... 2 | >13a |
| 12c | Has it happened 5 or more days in the past 30 days?                                                                              | Yes ..... 1<br>No ..... 2 |      |
| 13a | Do any of your children go to bed hungry because there is not enough money to buy food?                                          | Yes ..... 1<br>No ..... 2 | >14a |
| 13b | Has it happened in the past 30 days?                                                                                             | Yes ..... 1<br>No ..... 2 | >14a |
| 13c | Has it happened 5 or more days in the past 30 days?                                                                              | Yes ..... 1<br>No ..... 2 |      |

## SECTION B-3

## MONTHS OF FOOD SHORTAGES

| NO. | QUESTIONS AND FILTERS                                                                                                                                                                               | CODING CATEGORIES                                                                                                                                                                                             | SKIP |
|-----|-----------------------------------------------------------------------------------------------------------------------------------------------------------------------------------------------------|---------------------------------------------------------------------------------------------------------------------------------------------------------------------------------------------------------------|------|
| 14a | In the <u>past 12 months</u> , were there times when members of your household went hungry because there was not enough food in the house to eat?                                                   | Yes..... 1<br>No..... 2                                                                                                                                                                                       | ➤15a |
| 14b | Which were the months (in the last 12 months) in which you experienced a lack of food or money such that one or more members of your household had to go hungry?<br><br>Multiple responses possible | January..... 1<br>February..... 2<br>March..... 3<br>April..... 4<br>May..... 5<br>June..... 6<br>July..... 7<br>August..... 8<br>September..... 9<br>October..... 10<br>November..... 11<br>December..... 12 |      |
| 15a | In the <u>past 12 months</u> , were there times that there was a shortage of money in the household?                                                                                                | Yes..... 1<br>No..... 2                                                                                                                                                                                       | ➤C1  |
| 15b | Which were the months (in the last 12 months) in which there was a shortage of money?<br><br>Multiple responses possible                                                                            | January..... 1<br>February..... 2<br>March..... 3<br>April..... 4<br>May..... 5<br>June..... 6<br>July..... 7<br>August..... 8<br>September..... 9<br>October..... 10<br>November..... 11<br>December..... 12 |      |

## SECTION C

## ALCOHOL

| NO.                                                                               | QUESTIONS AND FILTERS                                                                                                      | CODING CATEGORIES                                                                                                    | SKIP |
|-----------------------------------------------------------------------------------|----------------------------------------------------------------------------------------------------------------------------|----------------------------------------------------------------------------------------------------------------------|------|
| <b>The following questions are about your feelings on laws concerning alcohol</b> |                                                                                                                            |                                                                                                                      |      |
| 1                                                                                 | At present the legal drinking age is 18 years. Do you think that the legal drinking age should be.....<br><br>Read options | Increased (raised)..... 1<br>Decreased or lowered..... 2<br>Remain the same..... 3<br>Don't know (no opinion)..... 4 |      |
| 2                                                                                 | Do you think that taxes on alcoholic drinks should be.....<br><br>Read options                                             | Increased (raised)..... 1<br>Decreased or lowered..... 2<br>Remain the same..... 3<br>Don't know (no opinion)..... 4 |      |
| 3                                                                                 | Do you think that alcoholic drinks should have warning labels about possible health hazards?                               | Yes..... 1<br>No..... 2<br>Don't know (no opinion)..... 3                                                            |      |

# SECTION C

# ALCOHOL

| NO.                                                                                   | QUESTIONS AND FILTERS                                                                                                                                                                                                                                                                                                 | CODING CATEGORIES                                                                                                                              | SKIP       |
|---------------------------------------------------------------------------------------|-----------------------------------------------------------------------------------------------------------------------------------------------------------------------------------------------------------------------------------------------------------------------------------------------------------------------|------------------------------------------------------------------------------------------------------------------------------------------------|------------|
| <b>The following questions are on alcohol use in your household and neighbourhood</b> |                                                                                                                                                                                                                                                                                                                       |                                                                                                                                                |            |
| 4                                                                                     | Who in your household consumes alcohol?<br><br>Multiple responses possible                                                                                                                                                                                                                                            | Everyone..... 1<br>Adult Men..... 2<br>Adult Women..... 3<br>Teenage boys..... 4<br>Teenage girls..... 5<br>Nobody..... 6<br>Don't know..... 7 | ➤ 8<br>➤ 8 |
| 5                                                                                     | How serious is the problem of drinking and driving amongst members of your household?                                                                                                                                                                                                                                 | Very serious..... 1<br>Serious..... 2<br>Not very serious..... 3<br>Not a problem..... 4<br>Don't know (no opinion)..... 5                     |            |
| 6                                                                                     | How serious are the problems of misuse of alcohol in your household?<br>Probe<br>Has any member of the family failed to fulfil obligations at work, school or home as a result of alcohol use eg. repeated absences or poor work performance, suspensions or expulsions from school, neglect of children or household | Very serious..... 1<br>Serious..... 2<br>Not very serious..... 3<br>Not a problem..... 4<br>Don't know (no opinion)..... 5                     |            |
| 7                                                                                     | How serious is the problem of violence or disturbances due to alcohol use in your home?                                                                                                                                                                                                                               | Very serious..... 1<br>Serious..... 2<br>Not very serious..... 3<br>Not a problem..... 4<br>Don't know (no opinion)..... 5                     |            |
| 8                                                                                     | How serious is the problem of drinking and driving in your neighbourhood?                                                                                                                                                                                                                                             | Very serious..... 1<br>Serious..... 2<br>Not very serious..... 3<br>Not a problem..... 4<br>Don't know (no opinion)..... 5                     |            |
| 9                                                                                     | How serious is the problem of public fights or disturbances due to alcohol use in your neighbourhood?                                                                                                                                                                                                                 | Very serious..... 1<br>Serious..... 2<br>Not very serious..... 3<br>Not a problem..... 4<br>Don't know (no opinion)..... 5                     |            |
| <b>If no one in the household consumes alcohol, skip to Section D</b>                 |                                                                                                                                                                                                                                                                                                                       |                                                                                                                                                | ➤Section D |
| 10                                                                                    | Do you or members of the household snack while drinking alcohol?                                                                                                                                                                                                                                                      | Yes..... 1<br>No..... 2<br>Don't know..... 3                                                                                                   |            |
| 11                                                                                    | Do you or members of the household eat before you drink?                                                                                                                                                                                                                                                              | Yes..... 1<br>No..... 2<br>Don't know..... 3                                                                                                   |            |

## SECTION D

## HEALTH INSURANCE - ASK HOUSEHOLD HEAD

| NO. | QUESTIONS AND FILTERS                                                                                        | CODING CATEGORIES                                                                                                                                                                                                                                                                                                   | SKIP              |
|-----|--------------------------------------------------------------------------------------------------------------|---------------------------------------------------------------------------------------------------------------------------------------------------------------------------------------------------------------------------------------------------------------------------------------------------------------------|-------------------|
| 1   | Where do you usually get your health care from?                                                              | Private doctor's office .....1<br>Private clinic or health care facility .....2<br>Private hospital .....3<br>Public clinic or health care facility .....4<br>Public hospital .....5<br>Charity or church run clinic .....6<br>Charity or church run hospital .....7<br>Home visit .....8<br>Other (Specify) .....9 |                   |
| 2   | Do you have private medical aid / health insurance either in your own name or through another family member? | Yes, in own name ..... 1<br>Yes, through a family member ..... 2<br>No ..... 3                                                                                                                                                                                                                                      | ➤ 4<br>➤ 4        |
| 3   | If you are not covered by a medical scheme, which of the following do you do?<br>Read options                | Pay out of your pocket to see a doctor or buy medicines from pharmacies .....1<br>Rely on public sector for all health care services .....2<br>Don't know .....3                                                                                                                                                    | ➤ 6<br>➤ 6<br>➤ 6 |
| 4   | Does your medical aid / health insurance cover any part of the cost of prescription medication?              | Yes .....1<br>No .....2<br>Don't know .....3                                                                                                                                                                                                                                                                        |                   |
| 5   | Overall, how satisfied are you with your medical aid / health insurance coverage?                            | Very satisfied .....1<br>Satisfied .....2<br>Neither satisfied nor dissatisfied .....3<br>Dissatisfied .....4<br>Very dissatisfied .....5<br>Don't know .....6                                                                                                                                                      |                   |
| 6   | How satisfied or dissatisfied are you with the quality of the health care you receive?                       | Very satisfied .....1<br>Satisfied .....2<br>Neither satisfied nor dissatisfied .....3<br>Dissatisfied .....4<br>Very dissatisfied .....5<br>Don't know .....6                                                                                                                                                      |                   |
| 7   | How satisfied or dissatisfied are you with the cost of your health care?                                     | Very satisfied .....1<br>Satisfied .....2<br>Neither satisfied nor dissatisfied .....3<br>Dissatisfied .....4<br>Very dissatisfied .....5<br>Don't know .....6                                                                                                                                                      |                   |
| 8   | In the past 12 months, have you had difficulty affording the cost of necessary medical care?                 | Yes .....1<br>No .....2<br>Don't know .....3                                                                                                                                                                                                                                                                        |                   |
| 9   | In the past 12 months have you had difficulty affording the cost of prescription medication?                 | Yes .....1<br>No .....2<br>Don't know .....3                                                                                                                                                                                                                                                                        |                   |
| 10  | In the past 12 months, have you put off or postponed getting the health care you needed?                     | Yes .....1<br>No .....2<br>Don't know .....3                                                                                                                                                                                                                                                                        |                   |

## SECTION D

## HEALTH INSURANCE - ASK HOUSEHOLD HEAD

| NO.                                                                                                                                                                                                                                                                                                                                                                    | QUESTIONS AND FILTERS                                                                                                                                                                                   | CODING CATEGORIES                                                                                                                                                                                                                                                                                       | SKIP         |
|------------------------------------------------------------------------------------------------------------------------------------------------------------------------------------------------------------------------------------------------------------------------------------------------------------------------------------------------------------------------|---------------------------------------------------------------------------------------------------------------------------------------------------------------------------------------------------------|---------------------------------------------------------------------------------------------------------------------------------------------------------------------------------------------------------------------------------------------------------------------------------------------------------|--------------|
| 11                                                                                                                                                                                                                                                                                                                                                                     | Please tell me how serious a problem you think it is that many South Africans lack access to a medical aid scheme and private health care facilities.<br><br>Read options                               | Very serious problem .....1<br>Fairly serious problem .....2<br>Somewhat serious problem .....3<br>Not a serious problem .....4<br>Don't know .....5                                                                                                                                                    |              |
| 12                                                                                                                                                                                                                                                                                                                                                                     | Is it right or wrong that people with higher incomes can afford better health care than people with lower incomes?<br><br>Read options                                                                  | Definitely right .....1<br>Somewhat right .....2<br>Neither right nor wrong .....3<br>Somewhat wrong .....4<br>Definitely wrong .....5<br>Can't choose .....6                                                                                                                                           |              |
| 13                                                                                                                                                                                                                                                                                                                                                                     | In the past <u>6 months</u> , have you seen, read or heard any news or information about a proposal by government to introduce a programme to provide national health insurance for all South Africans? | Yes .....1<br>No .....2<br>Don't know .....3                                                                                                                                                                                                                                                            | ➤ 15<br>➤ 15 |
| 14                                                                                                                                                                                                                                                                                                                                                                     | Would you say that you know a lot, a fair amount, a little or not yet enough about the proposed national health insurance?                                                                              | A lot .....1<br>A fair amount .....2<br>A little .....3<br>Not yet enough .....4                                                                                                                                                                                                                        |              |
| <p><b>We are now going to talk about some of the changes government is planning with regard to health care in South Africa. The government wants to create a National Health Insurance, which is a system in which everyone is covered by health insurance and people contribute according to ability to pay and use health services according to their needs.</b></p> |                                                                                                                                                                                                         |                                                                                                                                                                                                                                                                                                         |              |
| 15                                                                                                                                                                                                                                                                                                                                                                     | Should national health insurance for all South Africans be .....?<br><br>Read options                                                                                                                   | Top priority .....1<br>Important but lower priority .....2<br>Not too important .....3<br>Should not be done .....4<br>Don't know .....5                                                                                                                                                                |              |
| 16                                                                                                                                                                                                                                                                                                                                                                     | Which priority do you think the country should focus on first .....?<br><br>Read options                                                                                                                | Make health care better and more affordable .....1<br>Provide health insurance for all South Africans .....2<br>Don't know .....3                                                                                                                                                                       |              |
| 17                                                                                                                                                                                                                                                                                                                                                                     | Do you think that as a country we could afford to provide everyone with all the health and medical services which they need, <u>OR</u> would that cost more than the country can afford?                | We could afford to .....1<br>Would cost too much .....2<br>Don't know .....3                                                                                                                                                                                                                            |              |
| 18                                                                                                                                                                                                                                                                                                                                                                     | Which of the following do you think is more important.....?<br><br>Read options                                                                                                                         | Health Insurance for all, even if it means raising taxes .....1<br>Holding down taxes, even if it means some people don't have health insurance .....2<br>Don't know .....3                                                                                                                             |              |
| 19                                                                                                                                                                                                                                                                                                                                                                     | Which of the following would you prefer.....?<br><br>Read options                                                                                                                                       | Current medical aid system - where some people and their families get their medical aid through employers, while many people have no medical aid ..... 1<br>Universal national health insurance program - where everyone is covered under a program financed by taxpayers ..... 2<br>Don't know ..... 3 |              |

## SECTION D

## HEALTH INSURANCE - ASK HOUSEHOLD HEAD

| NO. | QUESTIONS AND FILTERS                                                                                                                                                                                                       | CODING CATEGORIES                                                                                                                              | SKIP |
|-----|-----------------------------------------------------------------------------------------------------------------------------------------------------------------------------------------------------------------------------|------------------------------------------------------------------------------------------------------------------------------------------------|------|
| 20  | If the planned national health insurance lowered your health care costs and provided cover to all South Africans, <u>but</u> limited your choice of doctor, hospital or treatment, would you support or oppose such a plan? | Support .....1<br>Oppose .....2<br>Don't know .....3                                                                                           |      |
| 21  | If there was a health insurance scheme that would cover the health care costs of all South Africans, whom would you trust most to run this scheme?<br><br>Read options                                                      | Organisation linked to government .....1<br>A private organisation .....2<br>Don't know .....3                                                 |      |
| 22  | To what extent do you agree or disagree that it would be cheaper to have a government operated national health insurance compared to the current arrangements?                                                              | Strongly agree .....1<br>Agree .....2<br>Neither agree nor disagree .....3<br>Disagree .....4<br>Strongly disagree .....5<br>Don't know .....6 |      |
| 23  | If government goes ahead and introduces the health insurance scheme that would cover the health care costs for all South Africans, do you think <u>you and your family</u> would be financially .....?<br><br>Read options  | Better off .....1<br>Worse off .....2<br>It would not have much effect .....3<br>Don't know .....4                                             |      |
| 24  | If government goes ahead and introduces the health insurance scheme that would cover the health care costs for all South Africans, do you think <u>the country as a whole</u> would be overall .....?<br><br>Read options   | Better off .....1<br>Worse off .....2<br>It would not have much effect .....3<br>Don't know .....4                                             |      |
| 25  | Do you believe that the proposed national health insurance would make the <u>quality of the health care you receive</u> better, worse, or about the same as now?                                                            | Better .....1<br>Worse .....2<br>About the same .....3<br>Don't know .....4                                                                    |      |

## SECTION E

## HOUSING, HOUSEHOLD GOODS AND SERVICES

| NO. | QUESTIONS AND FILTERS                                                               | CODING CATEGORIES                                                                                                                                                                                                                                                                                                                                                                                                                                                                                                                                                                                                                                              | SKIP |
|-----|-------------------------------------------------------------------------------------|----------------------------------------------------------------------------------------------------------------------------------------------------------------------------------------------------------------------------------------------------------------------------------------------------------------------------------------------------------------------------------------------------------------------------------------------------------------------------------------------------------------------------------------------------------------------------------------------------------------------------------------------------------------|------|
| 1   | Type of dwelling?<br><br>(FIELDWORKER: Please observe then record your observation) | House of brick/ concrete block structure on a separate stand or yard or on a farm ..... 1<br>Traditional dwelling / hut / structure made of traditional materials ..... 2<br>Flat or apartment in a block of flats ..... 3<br>Cluster house in complex ..... 4<br>Townhouse ( semi-detached house in complex) ..... 5<br>Semi-detached house ..... 6<br>House / flat / room in backyard ..... 7<br>Informal dwelling / shack in back yard ..... 8<br>Informal dwelling / shack not in back yard ..... 9<br>Room or flatlet on a property or larger dwelling / servant's quarters / granny flat ..... 10<br>Caravan / tent ..... 11<br>Other (Specify) ..... 12 |      |

# SECTION E

# HOUSING, HOUSEHOLD GOODS AND SERVICES

| NO. | QUESTIONS AND FILTERS                                                                                                                                    | CODING CATEGORIES                                                                                                                                                                                                                                                                                                                                                | SKIP                                |
|-----|----------------------------------------------------------------------------------------------------------------------------------------------------------|------------------------------------------------------------------------------------------------------------------------------------------------------------------------------------------------------------------------------------------------------------------------------------------------------------------------------------------------------------------|-------------------------------------|
| 2   | <p>Construction material of the walls and roof?</p> <p>(FIELDWORKER: Please observe then record your observation)</p> <p>Multiple responses possible</p> | <p>Brick ..... 1</p> <p>Cement block / concrete..... 2</p> <p>Corrugated iron / zinc ..... 3</p> <p>Wood..... 4</p> <p>Plastic ..... 5</p> <p>Cardboard..... 6</p> <p>Mud and cement mix ..... 7</p> <p>Wattle and daub..... 8</p> <p>Tile ..... 9</p> <p>Mud..... 10</p> <p>Thatch / grass ..... 11</p> <p>Asbestos ..... 12</p> <p>Other (Specify)..... 13</p> |                                     |
| 3   | <p>How many rooms does your dwelling consist of?</p> <p><u>Note:</u> exclude bathrooms and toilets.</p>                                                  | <p>Rooms..... <input type="text"/> <input type="text"/></p>                                                                                                                                                                                                                                                                                                      |                                     |
| 4   | <p>How many rooms in your dwelling are used for sleeping?</p> <p><u>Note:</u> a room may also have another purpose besides as a bedroom.</p>             | <p>Rooms for sleeping..... <input type="text"/> <input type="text"/></p>                                                                                                                                                                                                                                                                                         |                                     |
| 5   | <p>Do you have windows in your household that open easily?</p>                                                                                           | <p>Yes..... 1</p> <p>No ..... 2</p> <p>Do not have windows in the household..... 3</p>                                                                                                                                                                                                                                                                           |                                     |
| 6   | <p>Are you able to ventilate or allow “fresh air” through your household?</p>                                                                            | <p>Yes..... 1</p> <p>No ..... 2</p>                                                                                                                                                                                                                                                                                                                              |                                     |
| 7   | <p>For what length of time do the windows stay open every day?</p>                                                                                       | <p>2-4 Hours ..... 1</p> <p>4-6 Hours..... 2</p> <p>More than 6 hours..... 3</p>                                                                                                                                                                                                                                                                                 |                                     |
| 8   | <p>What is the <u>main</u> source of drinking water for members of your household?</p>                                                                   | <p>Piped water (tap) in dwelling ..... 1</p> <p>Piped water (tap) in site / yard..... 2</p> <p>Bottled water ..... 3</p> <p>Water carrier/ tanker..... 4</p> <p>Rain water tank..... 5</p> <p>Borehole / well / spring ..... 6</p> <p>Dam / river / stream ..... 7</p> <p>Public / communal tap ..... 8</p> <p>Other (Specify)..... 9</p>                        | <p>➤ 10</p> <p>➤ 10</p> <p>➤ 10</p> |
| 9   | <p>How long does it take you to go there, get water, and come back?</p>                                                                                  | <p>Minutes..... <input type="text"/> <input type="text"/> <input type="text"/></p>                                                                                                                                                                                                                                                                               |                                     |
| 10  | <p>What is this household’s main source of water for household use (other than for drinking)?</p>                                                        | <p>Regional / local water scheme (operated by municipality or other services provider)..... 1</p> <p>Borehole..... 2</p> <p>Spring..... 3</p> <p>Rain-water tank..... 4</p> <p>Dam / pool/ stagnant water..... 5</p> <p>River / stream ..... 6</p> <p>Water vendor ..... 7</p> <p>Water tanker ..... 8</p> <p>Other (Specify)..... 9</p>                         |                                     |

**SECTION E**
**HOUSING, HOUSEHOLD GOODS AND SERVICES**

| NO. | QUESTIONS AND FILTERS                                                               | CODING CATEGORIES                                                                                                                                                                                                                                                                 | SKIP |
|-----|-------------------------------------------------------------------------------------|-----------------------------------------------------------------------------------------------------------------------------------------------------------------------------------------------------------------------------------------------------------------------------------|------|
| 11  | What kind of toilet facilities does your household have?                            | Flush toilet (connected to sewerage system)..... 1<br>Flush toilet (with septic tank) ..... 2<br>Chemical toilet ..... 3<br>Pit toilet with ventilation (VIP)..... 4<br>Pit toilet without ventilation ..... 5<br>Bucket toilet ..... 6<br>Other (Specify)..... 7<br>None ..... 8 | ➤ 13 |
| 12  | Do you share this toilet with other households                                      | Yes..... 1<br>No ..... 2                                                                                                                                                                                                                                                          |      |
| 13  | What is this household's <u>main</u> source of energy for <u>cooking</u> purposes?  | Electricity..... 1<br>Coal..... 2<br>Wood..... 3<br>Gas ..... 4<br>Paraffin..... 5<br>Animal dung..... 6<br>Solar..... 7<br>Other (Specify)..... 8<br>None ..... 9                                                                                                                |      |
| 14  | What is this household's <u>main</u> source of energy for <u>heating</u> purposes?  | Electricity..... 1<br>Coal..... 2<br>Wood..... 3<br>Gas ..... 4<br>Paraffin..... 5<br>Animal dung..... 6<br>Solar..... 7<br>Other (Specify)..... 8<br>None ..... 9                                                                                                                |      |
| 15  | What is this household's <u>main</u> source of energy for <u>lighting</u> purposes? | Electricity..... 1<br>Gas ..... 2<br>Paraffin..... 3<br>Candles..... 4<br>Solar..... 5<br>Other (Specify)..... 6<br>None ..... 7                                                                                                                                                  |      |
| 16  | How is refuse or rubbish in this household mainly disposed of?                      | Removed by local authorities at least once a week ..... 1<br>Removed by local authorities less than once a week ..... 2<br>Communal refuse dump ..... 3<br>Own refuse dump ..... 4<br>Burn refuse / rubbish ..... 5<br>No rubbish disposal ..... 6<br>Other (Specify)..... 7      |      |



## SECTION E

## HOUSING, HOUSEHOLD GOODS AND SERVICES

| NO.                                                                         | QUESTIONS AND FILTERS                                                                                                                                | CODING CATEGORIES                                                                                                                                                                                                                                                                                                                                                                                                                                                                                                                                                                                                                                                                                                                                                                                                                                                                                                                                                                                                                                                                                                                                                                                                                                                                                                                                                                                                                                                                                                                                                                                                                                                                                                                                                                                 | SKIP                                                         |     |                                                                             |             |                                  |   |                                                      |   |                                                   |                              |                      |   |                      |   |   |               |   |   |           |   |   |                 |   |   |               |   |   |                 |   |   |            |   |   |                           |   |   |                 |   |   |                     |   |   |                            |   |   |  |
|-----------------------------------------------------------------------------|------------------------------------------------------------------------------------------------------------------------------------------------------|---------------------------------------------------------------------------------------------------------------------------------------------------------------------------------------------------------------------------------------------------------------------------------------------------------------------------------------------------------------------------------------------------------------------------------------------------------------------------------------------------------------------------------------------------------------------------------------------------------------------------------------------------------------------------------------------------------------------------------------------------------------------------------------------------------------------------------------------------------------------------------------------------------------------------------------------------------------------------------------------------------------------------------------------------------------------------------------------------------------------------------------------------------------------------------------------------------------------------------------------------------------------------------------------------------------------------------------------------------------------------------------------------------------------------------------------------------------------------------------------------------------------------------------------------------------------------------------------------------------------------------------------------------------------------------------------------------------------------------------------------------------------------------------------------|--------------------------------------------------------------|-----|-----------------------------------------------------------------------------|-------------|----------------------------------|---|------------------------------------------------------|---|---------------------------------------------------|------------------------------|----------------------|---|----------------------|---|---|---------------|---|---|-----------|---|---|-----------------|---|---|---------------|---|---|-----------------|---|---|------------|---|---|---------------------------|---|---|-----------------|---|---|---------------------|---|---|----------------------------|---|---|--|
| 17                                                                          | <p>Does this household own any of the following in working order?</p> <p>Read options<br/>Enter a response for each option</p>                       | <table border="0"> <tr> <td></td> <td style="text-align: right;">YES</td> <td style="text-align: right;">NO</td> </tr> <tr> <td>Fridge.....</td> <td style="text-align: right;">1</td> <td style="text-align: right;">2</td> </tr> <tr> <td>Electric / gas stove.....</td> <td style="text-align: right;">1</td> <td style="text-align: right;">2</td> </tr> <tr> <td>Vacuum cleaner (Hoover).....</td> <td style="text-align: right;">1</td> <td style="text-align: right;">2</td> </tr> <tr> <td>Washing machine.....</td> <td style="text-align: right;">1</td> <td style="text-align: right;">2</td> </tr> <tr> <td>Computer.....</td> <td style="text-align: right;">1</td> <td style="text-align: right;">2</td> </tr> <tr> <td>DSTV.....</td> <td style="text-align: right;">1</td> <td style="text-align: right;">2</td> </tr> <tr> <td>DVD Player.....</td> <td style="text-align: right;">1</td> <td style="text-align: right;">2</td> </tr> <tr> <td>Motorcar.....</td> <td style="text-align: right;">1</td> <td style="text-align: right;">2</td> </tr> <tr> <td>Television.....</td> <td style="text-align: right;">1</td> <td style="text-align: right;">2</td> </tr> <tr> <td>Radio.....</td> <td style="text-align: right;">1</td> <td style="text-align: right;">2</td> </tr> <tr> <td>Telephone (landline).....</td> <td style="text-align: right;">1</td> <td style="text-align: right;">2</td> </tr> <tr> <td>Cell phone.....</td> <td style="text-align: right;">1</td> <td style="text-align: right;">2</td> </tr> <tr> <td>Mail box / Bag.....</td> <td style="text-align: right;">1</td> <td style="text-align: right;">2</td> </tr> <tr> <td>Mail delivery at home.....</td> <td style="text-align: right;">1</td> <td style="text-align: right;">2</td> </tr> </table> |                                                              | YES | NO                                                                          | Fridge..... | 1                                | 2 | Electric / gas stove.....                            | 1 | 2                                                 | Vacuum cleaner (Hoover)..... | 1                    | 2 | Washing machine..... | 1 | 2 | Computer..... | 1 | 2 | DSTV..... | 1 | 2 | DVD Player..... | 1 | 2 | Motorcar..... | 1 | 2 | Television..... | 1 | 2 | Radio..... | 1 | 2 | Telephone (landline)..... | 1 | 2 | Cell phone..... | 1 | 2 | Mail box / Bag..... | 1 | 2 | Mail delivery at home..... | 1 | 2 |  |
|                                                                             | YES                                                                                                                                                  | NO                                                                                                                                                                                                                                                                                                                                                                                                                                                                                                                                                                                                                                                                                                                                                                                                                                                                                                                                                                                                                                                                                                                                                                                                                                                                                                                                                                                                                                                                                                                                                                                                                                                                                                                                                                                                |                                                              |     |                                                                             |             |                                  |   |                                                      |   |                                                   |                              |                      |   |                      |   |   |               |   |   |           |   |   |                 |   |   |               |   |   |                 |   |   |            |   |   |                           |   |   |                 |   |   |                     |   |   |                            |   |   |  |
| Fridge.....                                                                 | 1                                                                                                                                                    | 2                                                                                                                                                                                                                                                                                                                                                                                                                                                                                                                                                                                                                                                                                                                                                                                                                                                                                                                                                                                                                                                                                                                                                                                                                                                                                                                                                                                                                                                                                                                                                                                                                                                                                                                                                                                                 |                                                              |     |                                                                             |             |                                  |   |                                                      |   |                                                   |                              |                      |   |                      |   |   |               |   |   |           |   |   |                 |   |   |               |   |   |                 |   |   |            |   |   |                           |   |   |                 |   |   |                     |   |   |                            |   |   |  |
| Electric / gas stove.....                                                   | 1                                                                                                                                                    | 2                                                                                                                                                                                                                                                                                                                                                                                                                                                                                                                                                                                                                                                                                                                                                                                                                                                                                                                                                                                                                                                                                                                                                                                                                                                                                                                                                                                                                                                                                                                                                                                                                                                                                                                                                                                                 |                                                              |     |                                                                             |             |                                  |   |                                                      |   |                                                   |                              |                      |   |                      |   |   |               |   |   |           |   |   |                 |   |   |               |   |   |                 |   |   |            |   |   |                           |   |   |                 |   |   |                     |   |   |                            |   |   |  |
| Vacuum cleaner (Hoover).....                                                | 1                                                                                                                                                    | 2                                                                                                                                                                                                                                                                                                                                                                                                                                                                                                                                                                                                                                                                                                                                                                                                                                                                                                                                                                                                                                                                                                                                                                                                                                                                                                                                                                                                                                                                                                                                                                                                                                                                                                                                                                                                 |                                                              |     |                                                                             |             |                                  |   |                                                      |   |                                                   |                              |                      |   |                      |   |   |               |   |   |           |   |   |                 |   |   |               |   |   |                 |   |   |            |   |   |                           |   |   |                 |   |   |                     |   |   |                            |   |   |  |
| Washing machine.....                                                        | 1                                                                                                                                                    | 2                                                                                                                                                                                                                                                                                                                                                                                                                                                                                                                                                                                                                                                                                                                                                                                                                                                                                                                                                                                                                                                                                                                                                                                                                                                                                                                                                                                                                                                                                                                                                                                                                                                                                                                                                                                                 |                                                              |     |                                                                             |             |                                  |   |                                                      |   |                                                   |                              |                      |   |                      |   |   |               |   |   |           |   |   |                 |   |   |               |   |   |                 |   |   |            |   |   |                           |   |   |                 |   |   |                     |   |   |                            |   |   |  |
| Computer.....                                                               | 1                                                                                                                                                    | 2                                                                                                                                                                                                                                                                                                                                                                                                                                                                                                                                                                                                                                                                                                                                                                                                                                                                                                                                                                                                                                                                                                                                                                                                                                                                                                                                                                                                                                                                                                                                                                                                                                                                                                                                                                                                 |                                                              |     |                                                                             |             |                                  |   |                                                      |   |                                                   |                              |                      |   |                      |   |   |               |   |   |           |   |   |                 |   |   |               |   |   |                 |   |   |            |   |   |                           |   |   |                 |   |   |                     |   |   |                            |   |   |  |
| DSTV.....                                                                   | 1                                                                                                                                                    | 2                                                                                                                                                                                                                                                                                                                                                                                                                                                                                                                                                                                                                                                                                                                                                                                                                                                                                                                                                                                                                                                                                                                                                                                                                                                                                                                                                                                                                                                                                                                                                                                                                                                                                                                                                                                                 |                                                              |     |                                                                             |             |                                  |   |                                                      |   |                                                   |                              |                      |   |                      |   |   |               |   |   |           |   |   |                 |   |   |               |   |   |                 |   |   |            |   |   |                           |   |   |                 |   |   |                     |   |   |                            |   |   |  |
| DVD Player.....                                                             | 1                                                                                                                                                    | 2                                                                                                                                                                                                                                                                                                                                                                                                                                                                                                                                                                                                                                                                                                                                                                                                                                                                                                                                                                                                                                                                                                                                                                                                                                                                                                                                                                                                                                                                                                                                                                                                                                                                                                                                                                                                 |                                                              |     |                                                                             |             |                                  |   |                                                      |   |                                                   |                              |                      |   |                      |   |   |               |   |   |           |   |   |                 |   |   |               |   |   |                 |   |   |            |   |   |                           |   |   |                 |   |   |                     |   |   |                            |   |   |  |
| Motorcar.....                                                               | 1                                                                                                                                                    | 2                                                                                                                                                                                                                                                                                                                                                                                                                                                                                                                                                                                                                                                                                                                                                                                                                                                                                                                                                                                                                                                                                                                                                                                                                                                                                                                                                                                                                                                                                                                                                                                                                                                                                                                                                                                                 |                                                              |     |                                                                             |             |                                  |   |                                                      |   |                                                   |                              |                      |   |                      |   |   |               |   |   |           |   |   |                 |   |   |               |   |   |                 |   |   |            |   |   |                           |   |   |                 |   |   |                     |   |   |                            |   |   |  |
| Television.....                                                             | 1                                                                                                                                                    | 2                                                                                                                                                                                                                                                                                                                                                                                                                                                                                                                                                                                                                                                                                                                                                                                                                                                                                                                                                                                                                                                                                                                                                                                                                                                                                                                                                                                                                                                                                                                                                                                                                                                                                                                                                                                                 |                                                              |     |                                                                             |             |                                  |   |                                                      |   |                                                   |                              |                      |   |                      |   |   |               |   |   |           |   |   |                 |   |   |               |   |   |                 |   |   |            |   |   |                           |   |   |                 |   |   |                     |   |   |                            |   |   |  |
| Radio.....                                                                  | 1                                                                                                                                                    | 2                                                                                                                                                                                                                                                                                                                                                                                                                                                                                                                                                                                                                                                                                                                                                                                                                                                                                                                                                                                                                                                                                                                                                                                                                                                                                                                                                                                                                                                                                                                                                                                                                                                                                                                                                                                                 |                                                              |     |                                                                             |             |                                  |   |                                                      |   |                                                   |                              |                      |   |                      |   |   |               |   |   |           |   |   |                 |   |   |               |   |   |                 |   |   |            |   |   |                           |   |   |                 |   |   |                     |   |   |                            |   |   |  |
| Telephone (landline).....                                                   | 1                                                                                                                                                    | 2                                                                                                                                                                                                                                                                                                                                                                                                                                                                                                                                                                                                                                                                                                                                                                                                                                                                                                                                                                                                                                                                                                                                                                                                                                                                                                                                                                                                                                                                                                                                                                                                                                                                                                                                                                                                 |                                                              |     |                                                                             |             |                                  |   |                                                      |   |                                                   |                              |                      |   |                      |   |   |               |   |   |           |   |   |                 |   |   |               |   |   |                 |   |   |            |   |   |                           |   |   |                 |   |   |                     |   |   |                            |   |   |  |
| Cell phone.....                                                             | 1                                                                                                                                                    | 2                                                                                                                                                                                                                                                                                                                                                                                                                                                                                                                                                                                                                                                                                                                                                                                                                                                                                                                                                                                                                                                                                                                                                                                                                                                                                                                                                                                                                                                                                                                                                                                                                                                                                                                                                                                                 |                                                              |     |                                                                             |             |                                  |   |                                                      |   |                                                   |                              |                      |   |                      |   |   |               |   |   |           |   |   |                 |   |   |               |   |   |                 |   |   |            |   |   |                           |   |   |                 |   |   |                     |   |   |                            |   |   |  |
| Mail box / Bag.....                                                         | 1                                                                                                                                                    | 2                                                                                                                                                                                                                                                                                                                                                                                                                                                                                                                                                                                                                                                                                                                                                                                                                                                                                                                                                                                                                                                                                                                                                                                                                                                                                                                                                                                                                                                                                                                                                                                                                                                                                                                                                                                                 |                                                              |     |                                                                             |             |                                  |   |                                                      |   |                                                   |                              |                      |   |                      |   |   |               |   |   |           |   |   |                 |   |   |               |   |   |                 |   |   |            |   |   |                           |   |   |                 |   |   |                     |   |   |                            |   |   |  |
| Mail delivery at home.....                                                  | 1                                                                                                                                                    | 2                                                                                                                                                                                                                                                                                                                                                                                                                                                                                                                                                                                                                                                                                                                                                                                                                                                                                                                                                                                                                                                                                                                                                                                                                                                                                                                                                                                                                                                                                                                                                                                                                                                                                                                                                                                                 |                                                              |     |                                                                             |             |                                  |   |                                                      |   |                                                   |                              |                      |   |                      |   |   |               |   |   |           |   |   |                 |   |   |               |   |   |                 |   |   |            |   |   |                           |   |   |                 |   |   |                     |   |   |                            |   |   |  |
| 18                                                                          | <p>If you don't have a telephone, where do members of your household mostly use a telephone if they need one?</p>                                    | <table border="0"> <tr> <td>At a neighbour nearby.....</td> <td style="text-align: right;">1</td> </tr> <tr> <td>At a public telephone nearby .....</td> <td style="text-align: right;">2</td> </tr> <tr> <td>At another location nearby .....</td> <td style="text-align: right;">3</td> </tr> <tr> <td>Somewhere else not nearby... ..</td> <td style="text-align: right;">4</td> </tr> <tr> <td>Nowhere .....</td> <td style="text-align: right;">5</td> </tr> <tr> <td>Other (Specify).....</td> <td style="text-align: right;">6</td> </tr> </table>                                                                                                                                                                                                                                                                                                                                                                                                                                                                                                                                                                                                                                                                                                                                                                                                                                                                                                                                                                                                                                                                                                                                                                                                                                         | At a neighbour nearby.....                                   | 1   | At a public telephone nearby .....                                          | 2           | At another location nearby ..... | 3 | Somewhere else not nearby... ..                      | 4 | Nowhere .....                                     | 5                            | Other (Specify)..... | 6 |                      |   |   |               |   |   |           |   |   |                 |   |   |               |   |   |                 |   |   |            |   |   |                           |   |   |                 |   |   |                     |   |   |                            |   |   |  |
| At a neighbour nearby.....                                                  | 1                                                                                                                                                    |                                                                                                                                                                                                                                                                                                                                                                                                                                                                                                                                                                                                                                                                                                                                                                                                                                                                                                                                                                                                                                                                                                                                                                                                                                                                                                                                                                                                                                                                                                                                                                                                                                                                                                                                                                                                   |                                                              |     |                                                                             |             |                                  |   |                                                      |   |                                                   |                              |                      |   |                      |   |   |               |   |   |           |   |   |                 |   |   |               |   |   |                 |   |   |            |   |   |                           |   |   |                 |   |   |                     |   |   |                            |   |   |  |
| At a public telephone nearby .....                                          | 2                                                                                                                                                    |                                                                                                                                                                                                                                                                                                                                                                                                                                                                                                                                                                                                                                                                                                                                                                                                                                                                                                                                                                                                                                                                                                                                                                                                                                                                                                                                                                                                                                                                                                                                                                                                                                                                                                                                                                                                   |                                                              |     |                                                                             |             |                                  |   |                                                      |   |                                                   |                              |                      |   |                      |   |   |               |   |   |           |   |   |                 |   |   |               |   |   |                 |   |   |            |   |   |                           |   |   |                 |   |   |                     |   |   |                            |   |   |  |
| At another location nearby .....                                            | 3                                                                                                                                                    |                                                                                                                                                                                                                                                                                                                                                                                                                                                                                                                                                                                                                                                                                                                                                                                                                                                                                                                                                                                                                                                                                                                                                                                                                                                                                                                                                                                                                                                                                                                                                                                                                                                                                                                                                                                                   |                                                              |     |                                                                             |             |                                  |   |                                                      |   |                                                   |                              |                      |   |                      |   |   |               |   |   |           |   |   |                 |   |   |               |   |   |                 |   |   |            |   |   |                           |   |   |                 |   |   |                     |   |   |                            |   |   |  |
| Somewhere else not nearby... ..                                             | 4                                                                                                                                                    |                                                                                                                                                                                                                                                                                                                                                                                                                                                                                                                                                                                                                                                                                                                                                                                                                                                                                                                                                                                                                                                                                                                                                                                                                                                                                                                                                                                                                                                                                                                                                                                                                                                                                                                                                                                                   |                                                              |     |                                                                             |             |                                  |   |                                                      |   |                                                   |                              |                      |   |                      |   |   |               |   |   |           |   |   |                 |   |   |               |   |   |                 |   |   |            |   |   |                           |   |   |                 |   |   |                     |   |   |                            |   |   |  |
| Nowhere .....                                                               | 5                                                                                                                                                    |                                                                                                                                                                                                                                                                                                                                                                                                                                                                                                                                                                                                                                                                                                                                                                                                                                                                                                                                                                                                                                                                                                                                                                                                                                                                                                                                                                                                                                                                                                                                                                                                                                                                                                                                                                                                   |                                                              |     |                                                                             |             |                                  |   |                                                      |   |                                                   |                              |                      |   |                      |   |   |               |   |   |           |   |   |                 |   |   |               |   |   |                 |   |   |            |   |   |                           |   |   |                 |   |   |                     |   |   |                            |   |   |  |
| Other (Specify).....                                                        | 6                                                                                                                                                    |                                                                                                                                                                                                                                                                                                                                                                                                                                                                                                                                                                                                                                                                                                                                                                                                                                                                                                                                                                                                                                                                                                                                                                                                                                                                                                                                                                                                                                                                                                                                                                                                                                                                                                                                                                                                   |                                                              |     |                                                                             |             |                                  |   |                                                      |   |                                                   |                              |                      |   |                      |   |   |               |   |   |           |   |   |                 |   |   |               |   |   |                 |   |   |            |   |   |                           |   |   |                 |   |   |                     |   |   |                            |   |   |  |
| 19                                                                          | <p>How does this household mainly access the internet?</p>                                                                                           | <table border="0"> <tr> <td>From home .....</td> <td style="text-align: right;">1</td> </tr> <tr> <td>From cell phone.....</td> <td style="text-align: right;">2</td> </tr> <tr> <td>From work.....</td> <td style="text-align: right;">3</td> </tr> <tr> <td>From elsewhere.....</td> <td style="text-align: right;">4</td> </tr> <tr> <td>No access to the internet.....</td> <td style="text-align: right;">5</td> </tr> </table>                                                                                                                                                                                                                                                                                                                                                                                                                                                                                                                                                                                                                                                                                                                                                                                                                                                                                                                                                                                                                                                                                                                                                                                                                                                                                                                                                              | From home .....                                              | 1   | From cell phone.....                                                        | 2           | From work.....                   | 3 | From elsewhere.....                                  | 4 | No access to the internet.....                    | 5                            |                      |   |                      |   |   |               |   |   |           |   |   |                 |   |   |               |   |   |                 |   |   |            |   |   |                           |   |   |                 |   |   |                     |   |   |                            |   |   |  |
| From home .....                                                             | 1                                                                                                                                                    |                                                                                                                                                                                                                                                                                                                                                                                                                                                                                                                                                                                                                                                                                                                                                                                                                                                                                                                                                                                                                                                                                                                                                                                                                                                                                                                                                                                                                                                                                                                                                                                                                                                                                                                                                                                                   |                                                              |     |                                                                             |             |                                  |   |                                                      |   |                                                   |                              |                      |   |                      |   |   |               |   |   |           |   |   |                 |   |   |               |   |   |                 |   |   |            |   |   |                           |   |   |                 |   |   |                     |   |   |                            |   |   |  |
| From cell phone.....                                                        | 2                                                                                                                                                    |                                                                                                                                                                                                                                                                                                                                                                                                                                                                                                                                                                                                                                                                                                                                                                                                                                                                                                                                                                                                                                                                                                                                                                                                                                                                                                                                                                                                                                                                                                                                                                                                                                                                                                                                                                                                   |                                                              |     |                                                                             |             |                                  |   |                                                      |   |                                                   |                              |                      |   |                      |   |   |               |   |   |           |   |   |                 |   |   |               |   |   |                 |   |   |            |   |   |                           |   |   |                 |   |   |                     |   |   |                            |   |   |  |
| From work.....                                                              | 3                                                                                                                                                    |                                                                                                                                                                                                                                                                                                                                                                                                                                                                                                                                                                                                                                                                                                                                                                                                                                                                                                                                                                                                                                                                                                                                                                                                                                                                                                                                                                                                                                                                                                                                                                                                                                                                                                                                                                                                   |                                                              |     |                                                                             |             |                                  |   |                                                      |   |                                                   |                              |                      |   |                      |   |   |               |   |   |           |   |   |                 |   |   |               |   |   |                 |   |   |            |   |   |                           |   |   |                 |   |   |                     |   |   |                            |   |   |  |
| From elsewhere.....                                                         | 4                                                                                                                                                    |                                                                                                                                                                                                                                                                                                                                                                                                                                                                                                                                                                                                                                                                                                                                                                                                                                                                                                                                                                                                                                                                                                                                                                                                                                                                                                                                                                                                                                                                                                                                                                                                                                                                                                                                                                                                   |                                                              |     |                                                                             |             |                                  |   |                                                      |   |                                                   |                              |                      |   |                      |   |   |               |   |   |           |   |   |                 |   |   |               |   |   |                 |   |   |            |   |   |                           |   |   |                 |   |   |                     |   |   |                            |   |   |  |
| No access to the internet.....                                              | 5                                                                                                                                                    |                                                                                                                                                                                                                                                                                                                                                                                                                                                                                                                                                                                                                                                                                                                                                                                                                                                                                                                                                                                                                                                                                                                                                                                                                                                                                                                                                                                                                                                                                                                                                                                                                                                                                                                                                                                                   |                                                              |     |                                                                             |             |                                  |   |                                                      |   |                                                   |                              |                      |   |                      |   |   |               |   |   |           |   |   |                 |   |   |               |   |   |                 |   |   |            |   |   |                           |   |   |                 |   |   |                     |   |   |                            |   |   |  |
| 20                                                                          | <p>Does this household engage in any agricultural (vegetable gardening) activities?</p>                                                              | <table border="0"> <tr> <td>Yes.....</td> <td style="text-align: right;">1</td> </tr> <tr> <td>No .....</td> <td style="text-align: right;">2</td> </tr> </table>                                                                                                                                                                                                                                                                                                                                                                                                                                                                                                                                                                                                                                                                                                                                                                                                                                                                                                                                                                                                                                                                                                                                                                                                                                                                                                                                                                                                                                                                                                                                                                                                                                 | Yes.....                                                     | 1   | No .....                                                                    | 2           | <p>➤ 23</p>                      |   |                                                      |   |                                                   |                              |                      |   |                      |   |   |               |   |   |           |   |   |                 |   |   |               |   |   |                 |   |   |            |   |   |                           |   |   |                 |   |   |                     |   |   |                            |   |   |  |
| Yes.....                                                                    | 1                                                                                                                                                    |                                                                                                                                                                                                                                                                                                                                                                                                                                                                                                                                                                                                                                                                                                                                                                                                                                                                                                                                                                                                                                                                                                                                                                                                                                                                                                                                                                                                                                                                                                                                                                                                                                                                                                                                                                                                   |                                                              |     |                                                                             |             |                                  |   |                                                      |   |                                                   |                              |                      |   |                      |   |   |               |   |   |           |   |   |                 |   |   |               |   |   |                 |   |   |            |   |   |                           |   |   |                 |   |   |                     |   |   |                            |   |   |  |
| No .....                                                                    | 2                                                                                                                                                    |                                                                                                                                                                                                                                                                                                                                                                                                                                                                                                                                                                                                                                                                                                                                                                                                                                                                                                                                                                                                                                                                                                                                                                                                                                                                                                                                                                                                                                                                                                                                                                                                                                                                                                                                                                                                   |                                                              |     |                                                                             |             |                                  |   |                                                      |   |                                                   |                              |                      |   |                      |   |   |               |   |   |           |   |   |                 |   |   |               |   |   |                 |   |   |            |   |   |                           |   |   |                 |   |   |                     |   |   |                            |   |   |  |
| 21                                                                          | <p>What kind of agricultural activities (vegetable gardening) is this household involved in?</p> <p>Multiple responses possible<br/>Read options</p> | <table border="0"> <tr> <td>Livestock production (cattle, goats, sheep, pigs, etc) .....</td> <td style="text-align: right;">1</td> </tr> <tr> <td>Poultry production (chicken, ducks, geese, guinea fowl, ostrich, etc) .....</td> <td style="text-align: right;">2</td> </tr> <tr> <td>Vegetable production.....</td> <td style="text-align: right;">3</td> </tr> <tr> <td>Production of other crops (grains, fruit, etc) .....</td> <td style="text-align: right;">4</td> </tr> <tr> <td>Fodder grazing / pasture / grass for animals.....</td> <td style="text-align: right;">5</td> </tr> <tr> <td>Other (Specify).....</td> <td style="text-align: right;">6</td> </tr> <tr> <td>None .....</td> <td style="text-align: right;">7</td> </tr> </table>                                                                                                                                                                                                                                                                                                                                                                                                                                                                                                                                                                                                                                                                                                                                                                                                                                                                                                                                                                                                                                       | Livestock production (cattle, goats, sheep, pigs, etc) ..... | 1   | Poultry production (chicken, ducks, geese, guinea fowl, ostrich, etc) ..... | 2           | Vegetable production.....        | 3 | Production of other crops (grains, fruit, etc) ..... | 4 | Fodder grazing / pasture / grass for animals..... | 5                            | Other (Specify)..... | 6 | None .....           | 7 |   |               |   |   |           |   |   |                 |   |   |               |   |   |                 |   |   |            |   |   |                           |   |   |                 |   |   |                     |   |   |                            |   |   |  |
| Livestock production (cattle, goats, sheep, pigs, etc) .....                | 1                                                                                                                                                    |                                                                                                                                                                                                                                                                                                                                                                                                                                                                                                                                                                                                                                                                                                                                                                                                                                                                                                                                                                                                                                                                                                                                                                                                                                                                                                                                                                                                                                                                                                                                                                                                                                                                                                                                                                                                   |                                                              |     |                                                                             |             |                                  |   |                                                      |   |                                                   |                              |                      |   |                      |   |   |               |   |   |           |   |   |                 |   |   |               |   |   |                 |   |   |            |   |   |                           |   |   |                 |   |   |                     |   |   |                            |   |   |  |
| Poultry production (chicken, ducks, geese, guinea fowl, ostrich, etc) ..... | 2                                                                                                                                                    |                                                                                                                                                                                                                                                                                                                                                                                                                                                                                                                                                                                                                                                                                                                                                                                                                                                                                                                                                                                                                                                                                                                                                                                                                                                                                                                                                                                                                                                                                                                                                                                                                                                                                                                                                                                                   |                                                              |     |                                                                             |             |                                  |   |                                                      |   |                                                   |                              |                      |   |                      |   |   |               |   |   |           |   |   |                 |   |   |               |   |   |                 |   |   |            |   |   |                           |   |   |                 |   |   |                     |   |   |                            |   |   |  |
| Vegetable production.....                                                   | 3                                                                                                                                                    |                                                                                                                                                                                                                                                                                                                                                                                                                                                                                                                                                                                                                                                                                                                                                                                                                                                                                                                                                                                                                                                                                                                                                                                                                                                                                                                                                                                                                                                                                                                                                                                                                                                                                                                                                                                                   |                                                              |     |                                                                             |             |                                  |   |                                                      |   |                                                   |                              |                      |   |                      |   |   |               |   |   |           |   |   |                 |   |   |               |   |   |                 |   |   |            |   |   |                           |   |   |                 |   |   |                     |   |   |                            |   |   |  |
| Production of other crops (grains, fruit, etc) .....                        | 4                                                                                                                                                    |                                                                                                                                                                                                                                                                                                                                                                                                                                                                                                                                                                                                                                                                                                                                                                                                                                                                                                                                                                                                                                                                                                                                                                                                                                                                                                                                                                                                                                                                                                                                                                                                                                                                                                                                                                                                   |                                                              |     |                                                                             |             |                                  |   |                                                      |   |                                                   |                              |                      |   |                      |   |   |               |   |   |           |   |   |                 |   |   |               |   |   |                 |   |   |            |   |   |                           |   |   |                 |   |   |                     |   |   |                            |   |   |  |
| Fodder grazing / pasture / grass for animals.....                           | 5                                                                                                                                                    |                                                                                                                                                                                                                                                                                                                                                                                                                                                                                                                                                                                                                                                                                                                                                                                                                                                                                                                                                                                                                                                                                                                                                                                                                                                                                                                                                                                                                                                                                                                                                                                                                                                                                                                                                                                                   |                                                              |     |                                                                             |             |                                  |   |                                                      |   |                                                   |                              |                      |   |                      |   |   |               |   |   |           |   |   |                 |   |   |               |   |   |                 |   |   |            |   |   |                           |   |   |                 |   |   |                     |   |   |                            |   |   |  |
| Other (Specify).....                                                        | 6                                                                                                                                                    |                                                                                                                                                                                                                                                                                                                                                                                                                                                                                                                                                                                                                                                                                                                                                                                                                                                                                                                                                                                                                                                                                                                                                                                                                                                                                                                                                                                                                                                                                                                                                                                                                                                                                                                                                                                                   |                                                              |     |                                                                             |             |                                  |   |                                                      |   |                                                   |                              |                      |   |                      |   |   |               |   |   |           |   |   |                 |   |   |               |   |   |                 |   |   |            |   |   |                           |   |   |                 |   |   |                     |   |   |                            |   |   |  |
| None .....                                                                  | 7                                                                                                                                                    |                                                                                                                                                                                                                                                                                                                                                                                                                                                                                                                                                                                                                                                                                                                                                                                                                                                                                                                                                                                                                                                                                                                                                                                                                                                                                                                                                                                                                                                                                                                                                                                                                                                                                                                                                                                                   |                                                              |     |                                                                             |             |                                  |   |                                                      |   |                                                   |                              |                      |   |                      |   |   |               |   |   |           |   |   |                 |   |   |               |   |   |                 |   |   |            |   |   |                           |   |   |                 |   |   |                     |   |   |                            |   |   |  |
| 22                                                                          | <p>Where does the household operate its agricultural activities (vegetable gardening)?</p> <p>Read options</p>                                       | <table border="0"> <tr> <td>Farm land.....</td> <td style="text-align: right;">1</td> </tr> <tr> <td>Back yard or school.....</td> <td style="text-align: right;">2</td> </tr> <tr> <td>Communal or tribal land .....</td> <td style="text-align: right;">3</td> </tr> <tr> <td>Other (Specify).....</td> <td style="text-align: right;">4</td> </tr> <tr> <td>Not applicable .....</td> <td style="text-align: right;">5</td> </tr> </table>                                                                                                                                                                                                                                                                                                                                                                                                                                                                                                                                                                                                                                                                                                                                                                                                                                                                                                                                                                                                                                                                                                                                                                                                                                                                                                                                                     | Farm land.....                                               | 1   | Back yard or school.....                                                    | 2           | Communal or tribal land .....    | 3 | Other (Specify).....                                 | 4 | Not applicable .....                              | 5                            |                      |   |                      |   |   |               |   |   |           |   |   |                 |   |   |               |   |   |                 |   |   |            |   |   |                           |   |   |                 |   |   |                     |   |   |                            |   |   |  |
| Farm land.....                                                              | 1                                                                                                                                                    |                                                                                                                                                                                                                                                                                                                                                                                                                                                                                                                                                                                                                                                                                                                                                                                                                                                                                                                                                                                                                                                                                                                                                                                                                                                                                                                                                                                                                                                                                                                                                                                                                                                                                                                                                                                                   |                                                              |     |                                                                             |             |                                  |   |                                                      |   |                                                   |                              |                      |   |                      |   |   |               |   |   |           |   |   |                 |   |   |               |   |   |                 |   |   |            |   |   |                           |   |   |                 |   |   |                     |   |   |                            |   |   |  |
| Back yard or school.....                                                    | 2                                                                                                                                                    |                                                                                                                                                                                                                                                                                                                                                                                                                                                                                                                                                                                                                                                                                                                                                                                                                                                                                                                                                                                                                                                                                                                                                                                                                                                                                                                                                                                                                                                                                                                                                                                                                                                                                                                                                                                                   |                                                              |     |                                                                             |             |                                  |   |                                                      |   |                                                   |                              |                      |   |                      |   |   |               |   |   |           |   |   |                 |   |   |               |   |   |                 |   |   |            |   |   |                           |   |   |                 |   |   |                     |   |   |                            |   |   |  |
| Communal or tribal land .....                                               | 3                                                                                                                                                    |                                                                                                                                                                                                                                                                                                                                                                                                                                                                                                                                                                                                                                                                                                                                                                                                                                                                                                                                                                                                                                                                                                                                                                                                                                                                                                                                                                                                                                                                                                                                                                                                                                                                                                                                                                                                   |                                                              |     |                                                                             |             |                                  |   |                                                      |   |                                                   |                              |                      |   |                      |   |   |               |   |   |           |   |   |                 |   |   |               |   |   |                 |   |   |            |   |   |                           |   |   |                 |   |   |                     |   |   |                            |   |   |  |
| Other (Specify).....                                                        | 4                                                                                                                                                    |                                                                                                                                                                                                                                                                                                                                                                                                                                                                                                                                                                                                                                                                                                                                                                                                                                                                                                                                                                                                                                                                                                                                                                                                                                                                                                                                                                                                                                                                                                                                                                                                                                                                                                                                                                                                   |                                                              |     |                                                                             |             |                                  |   |                                                      |   |                                                   |                              |                      |   |                      |   |   |               |   |   |           |   |   |                 |   |   |               |   |   |                 |   |   |            |   |   |                           |   |   |                 |   |   |                     |   |   |                            |   |   |  |
| Not applicable .....                                                        | 5                                                                                                                                                    |                                                                                                                                                                                                                                                                                                                                                                                                                                                                                                                                                                                                                                                                                                                                                                                                                                                                                                                                                                                                                                                                                                                                                                                                                                                                                                                                                                                                                                                                                                                                                                                                                                                                                                                                                                                                   |                                                              |     |                                                                             |             |                                  |   |                                                      |   |                                                   |                              |                      |   |                      |   |   |               |   |   |           |   |   |                 |   |   |               |   |   |                 |   |   |            |   |   |                           |   |   |                 |   |   |                     |   |   |                            |   |   |  |
| 23                                                                          | <p>How far do you live from the nearest health clinic or hospital?</p>                                                                               | <table border="0"> <tr> <td>0-10 Kilometres.....</td> <td style="text-align: right;">1</td> </tr> <tr> <td>11-20 Kilometres.....</td> <td style="text-align: right;">2</td> </tr> <tr> <td>21-30 Kilometres.....</td> <td style="text-align: right;">3</td> </tr> <tr> <td>More than 30 Kilometres .....</td> <td style="text-align: right;">4</td> </tr> </table>                                                                                                                                                                                                                                                                                                                                                                                                                                                                                                                                                                                                                                                                                                                                                                                                                                                                                                                                                                                                                                                                                                                                                                                                                                                                                                                                                                                                                                | 0-10 Kilometres.....                                         | 1   | 11-20 Kilometres.....                                                       | 2           | 21-30 Kilometres.....            | 3 | More than 30 Kilometres .....                        | 4 |                                                   |                              |                      |   |                      |   |   |               |   |   |           |   |   |                 |   |   |               |   |   |                 |   |   |            |   |   |                           |   |   |                 |   |   |                     |   |   |                            |   |   |  |
| 0-10 Kilometres.....                                                        | 1                                                                                                                                                    |                                                                                                                                                                                                                                                                                                                                                                                                                                                                                                                                                                                                                                                                                                                                                                                                                                                                                                                                                                                                                                                                                                                                                                                                                                                                                                                                                                                                                                                                                                                                                                                                                                                                                                                                                                                                   |                                                              |     |                                                                             |             |                                  |   |                                                      |   |                                                   |                              |                      |   |                      |   |   |               |   |   |           |   |   |                 |   |   |               |   |   |                 |   |   |            |   |   |                           |   |   |                 |   |   |                     |   |   |                            |   |   |  |
| 11-20 Kilometres.....                                                       | 2                                                                                                                                                    |                                                                                                                                                                                                                                                                                                                                                                                                                                                                                                                                                                                                                                                                                                                                                                                                                                                                                                                                                                                                                                                                                                                                                                                                                                                                                                                                                                                                                                                                                                                                                                                                                                                                                                                                                                                                   |                                                              |     |                                                                             |             |                                  |   |                                                      |   |                                                   |                              |                      |   |                      |   |   |               |   |   |           |   |   |                 |   |   |               |   |   |                 |   |   |            |   |   |                           |   |   |                 |   |   |                     |   |   |                            |   |   |  |
| 21-30 Kilometres.....                                                       | 3                                                                                                                                                    |                                                                                                                                                                                                                                                                                                                                                                                                                                                                                                                                                                                                                                                                                                                                                                                                                                                                                                                                                                                                                                                                                                                                                                                                                                                                                                                                                                                                                                                                                                                                                                                                                                                                                                                                                                                                   |                                                              |     |                                                                             |             |                                  |   |                                                      |   |                                                   |                              |                      |   |                      |   |   |               |   |   |           |   |   |                 |   |   |               |   |   |                 |   |   |            |   |   |                           |   |   |                 |   |   |                     |   |   |                            |   |   |  |
| More than 30 Kilometres .....                                               | 4                                                                                                                                                    |                                                                                                                                                                                                                                                                                                                                                                                                                                                                                                                                                                                                                                                                                                                                                                                                                                                                                                                                                                                                                                                                                                                                                                                                                                                                                                                                                                                                                                                                                                                                                                                                                                                                                                                                                                                                   |                                                              |     |                                                                             |             |                                  |   |                                                      |   |                                                   |                              |                      |   |                      |   |   |               |   |   |           |   |   |                 |   |   |               |   |   |                 |   |   |            |   |   |                           |   |   |                 |   |   |                     |   |   |                            |   |   |  |
| 24                                                                          | <p>How far do you live from the nearest primary school?</p>                                                                                          | <table border="0"> <tr> <td>0-10 Kilometres.....</td> <td style="text-align: right;">1</td> </tr> <tr> <td>11-20 Kilometres.....</td> <td style="text-align: right;">2</td> </tr> <tr> <td>21-30 Kilometres.....</td> <td style="text-align: right;">3</td> </tr> <tr> <td>More than 30 Kilometres .....</td> <td style="text-align: right;">4</td> </tr> </table>                                                                                                                                                                                                                                                                                                                                                                                                                                                                                                                                                                                                                                                                                                                                                                                                                                                                                                                                                                                                                                                                                                                                                                                                                                                                                                                                                                                                                                | 0-10 Kilometres.....                                         | 1   | 11-20 Kilometres.....                                                       | 2           | 21-30 Kilometres.....            | 3 | More than 30 Kilometres .....                        | 4 |                                                   |                              |                      |   |                      |   |   |               |   |   |           |   |   |                 |   |   |               |   |   |                 |   |   |            |   |   |                           |   |   |                 |   |   |                     |   |   |                            |   |   |  |
| 0-10 Kilometres.....                                                        | 1                                                                                                                                                    |                                                                                                                                                                                                                                                                                                                                                                                                                                                                                                                                                                                                                                                                                                                                                                                                                                                                                                                                                                                                                                                                                                                                                                                                                                                                                                                                                                                                                                                                                                                                                                                                                                                                                                                                                                                                   |                                                              |     |                                                                             |             |                                  |   |                                                      |   |                                                   |                              |                      |   |                      |   |   |               |   |   |           |   |   |                 |   |   |               |   |   |                 |   |   |            |   |   |                           |   |   |                 |   |   |                     |   |   |                            |   |   |  |
| 11-20 Kilometres.....                                                       | 2                                                                                                                                                    |                                                                                                                                                                                                                                                                                                                                                                                                                                                                                                                                                                                                                                                                                                                                                                                                                                                                                                                                                                                                                                                                                                                                                                                                                                                                                                                                                                                                                                                                                                                                                                                                                                                                                                                                                                                                   |                                                              |     |                                                                             |             |                                  |   |                                                      |   |                                                   |                              |                      |   |                      |   |   |               |   |   |           |   |   |                 |   |   |               |   |   |                 |   |   |            |   |   |                           |   |   |                 |   |   |                     |   |   |                            |   |   |  |
| 21-30 Kilometres.....                                                       | 3                                                                                                                                                    |                                                                                                                                                                                                                                                                                                                                                                                                                                                                                                                                                                                                                                                                                                                                                                                                                                                                                                                                                                                                                                                                                                                                                                                                                                                                                                                                                                                                                                                                                                                                                                                                                                                                                                                                                                                                   |                                                              |     |                                                                             |             |                                  |   |                                                      |   |                                                   |                              |                      |   |                      |   |   |               |   |   |           |   |   |                 |   |   |               |   |   |                 |   |   |            |   |   |                           |   |   |                 |   |   |                     |   |   |                            |   |   |  |
| More than 30 Kilometres .....                                               | 4                                                                                                                                                    |                                                                                                                                                                                                                                                                                                                                                                                                                                                                                                                                                                                                                                                                                                                                                                                                                                                                                                                                                                                                                                                                                                                                                                                                                                                                                                                                                                                                                                                                                                                                                                                                                                                                                                                                                                                                   |                                                              |     |                                                                             |             |                                  |   |                                                      |   |                                                   |                              |                      |   |                      |   |   |               |   |   |           |   |   |                 |   |   |               |   |   |                 |   |   |            |   |   |                           |   |   |                 |   |   |                     |   |   |                            |   |   |  |

## SECTION E

## HOUSING, HOUSEHOLD GOODS AND SERVICES

| NO. | QUESTIONS AND FILTERS                             | CODING CATEGORIES                                                                                               | SKIP |
|-----|---------------------------------------------------|-----------------------------------------------------------------------------------------------------------------|------|
| 25  | How far do you live from the nearest high school? | 0-10 Kilometres..... 1<br>11-20 Kilometres..... 2<br>21-30 Kilometres..... 3<br>More than 30 Kilometres ..... 4 |      |

## SECTION F

## ACCESSIBILITY OF SERVICES

| NO. | QUESTIONS AND FILTERS                                                                                                                                                                                                                      | CODING CATEGORIES                                                                                                                        | SKIP |
|-----|--------------------------------------------------------------------------------------------------------------------------------------------------------------------------------------------------------------------------------------------|------------------------------------------------------------------------------------------------------------------------------------------|------|
|     | <p><b>I want to ask you about the places and facilities that are in your neighbourhood within easy walking distance (10-15 minutes). I will read you some statements. Please tell me how strongly you agree or disagree with each.</b></p> |                                                                                                                                          |      |
| 1   | <p>Many shops, stalls, markets or other places to buy things I need are within easy walking distance of my home.</p> <p>Read options</p>                                                                                                   | <p>Strongly disagree..... 1<br/>Somewhat disagree..... 2<br/>Don't know ..... 3<br/>Somewhat agree..... 4<br/>Strongly agree ..... 5</p> |      |
| 2   | <p>It is within a 10-15 minute walk to a public transport stop (i.e. bus stop, train station or taxi rank) from my home</p> <p>Read options</p>                                                                                            | <p>Strongly disagree..... 1<br/>Somewhat disagree..... 2<br/>Don't know ..... 3<br/>Somewhat agree..... 4<br/>Strongly agree ..... 5</p> |      |
| 3   | <p>There are pavements on most of the streets in my neighbourhood.</p> <p>Read options</p>                                                                                                                                                 | <p>Strongly disagree..... 1<br/>Somewhat disagree..... 2<br/>Don't know ..... 3<br/>Somewhat agree..... 4<br/>Strongly agree ..... 5</p> |      |
| 4   | <p>There are facilities to cycle in or near my neighbourhood, such as special lanes, separate paths or paths for shared use between bicycles and persons walking.</p> <p>Read options</p>                                                  | <p>Strongly disagree..... 1<br/>Somewhat disagree..... 2<br/>Don't know ..... 3<br/>Somewhat agree..... 4<br/>Strongly agree ..... 5</p> |      |
| 5   | <p>My neighbourhood has several free or affordable recreational facilities, such as parks, walking paths, bike paths, community centres, playgrounds, public swimming pools, etc.</p> <p>Read options</p>                                  | <p>Strongly disagree..... 1<br/>Somewhat disagree..... 2<br/>Don't know ..... 3<br/>Somewhat agree..... 4<br/>Strongly agree ..... 5</p> |      |
| 6   | <p>The crime rate in my neighbourhood makes it unsafe to go for a walk at night.</p> <p>Read options</p>                                                                                                                                   | <p>Strongly disagree..... 1<br/>Somewhat disagree..... 2<br/>Don't know ..... 3<br/>Somewhat agree..... 4<br/>Strongly agree ..... 5</p> |      |

## SECTION G

## COST OF LIVING

| NO. | QUESTIONS AND FILTERS                                                                                                                                 | CODING CATEGORIES                                                                                                                                                                                                                                                                                  | SKIP |
|-----|-------------------------------------------------------------------------------------------------------------------------------------------------------|----------------------------------------------------------------------------------------------------------------------------------------------------------------------------------------------------------------------------------------------------------------------------------------------------|------|
| 1   | <p>The cost of living is a concern for many families. Can you tell me which option best describes your household's situation?</p> <p>Read options</p> | <p>Not enough money for basic things like food and clothes ..... 1</p> <p>Money for food and clothes, but short on many other things ..... 2</p> <p>We have most of the important things, but few luxury goods ..... 3</p> <p>Money for extra things such as holidays and luxury goods ..... 4</p> |      |
| 2   | <p>What monthly income level do you consider to be minimal for your household, i.e. your household could not make ends meet with less?</p>            | <p>R .....</p>                                                                                                                                                                                                                                                                                     |      |
| 3   | <p>Is the total monthly income of your household higher, lower or more or less the same as this figure?</p> <p>Read options</p>                       | <p>Much higher ..... 1</p> <p>Higher ..... 2</p> <p>More or less the same ..... 3</p> <p>Lower ..... 4</p> <p>Much lower ..... 5</p> <p>Don't know ..... 6</p>                                                                                                                                     |      |
| 4   | <p>Thinking of the next 12 months, do you expect your financial situation to.....?</p> <p>Read options</p>                                            | <p>Improve ..... 1</p> <p>Stay about the same ..... 2</p> <p>To get worse ..... 3</p>                                                                                                                                                                                                              |      |

### 4 INSTRUCTION TO INTERVIEWER

Please explain that the information will be kept confidential

Could you please share with us a contact telephone number that we can use to reach you?

| Name | Telephone Number |  |  |  |  |  |  |  |  |  |
|------|------------------|--|--|--|--|--|--|--|--|--|
|      |                  |  |  |  |  |  |  |  |  |  |

Could you also please share with us a contact telephone number of a neighbour or a relative who we can contact if we cannot reach you?

| Name | Telephone Number |  |  |  |  |  |  |  |  |  |
|------|------------------|--|--|--|--|--|--|--|--|--|
|      |                  |  |  |  |  |  |  |  |  |  |

Thank you for providing information about this household.

Now we will be interviewing individual persons residing in this household

### 5 INSTRUCTION TO INTERVIEWER

Record the time at the end of the interview

|   |   |   |   |   |
|---|---|---|---|---|
| H | H | : | M | M |
|---|---|---|---|---|

## REFUSAL PARTICULARS (if applicable)

| NO. | QUESTIONS AND FILTERS                                                | CODING CATEGORIES                                                                                                                                                                                                                                                                                                                                                                             |
|-----|----------------------------------------------------------------------|-----------------------------------------------------------------------------------------------------------------------------------------------------------------------------------------------------------------------------------------------------------------------------------------------------------------------------------------------------------------------------------------------|
| 1   | At what point did the respondents refuse to take part in the survey? | At the gate or door ..... 1<br>After explanation of the survey ..... 2<br>After identifying the respondent ..... 3<br>During the household interview ..... 4<br>Other (Specify) ..... 5                                                                                                                                                                                                       |
| 2   | What was the reason for the refusal?                                 | Too busy to grant interview ..... 1<br>Not available now ..... 2<br>Too late in the evening ..... 3<br>Don't participate in surveys ..... 4<br>Objected to the topic of the survey ..... 5<br>Objected to providing information on household members ..... 6<br>Do not allow strangers on property ..... 7<br>Participated in the recent population census ..... 8<br>Other (Specify) ..... 9 |

| APPOINTED FIELD CHECKER | TEAM LEADER | OFFICE CHECKER |
|-------------------------|-------------|----------------|
| NAME                    | NAME        | NAME           |
| NUMBER                  | NUMBER      | NUMBER         |

| LAST TWO DIGITS OF THE VISITING POINT QUESTIONNAIRE NUMBER |    |    |     | NUMBER OF HOUSEHOLDS AT THE VISITING POINT |   |   |   |   |   |   |   |   |    |    |    |    |    |    |    |    |    |    |    |    |    |    |    |
|------------------------------------------------------------|----|----|-----|--------------------------------------------|---|---|---|---|---|---|---|---|----|----|----|----|----|----|----|----|----|----|----|----|----|----|----|
|                                                            |    |    |     | 1                                          | 2 | 3 | 4 | 5 | 6 | 7 | 8 | 9 | 10 | 11 | 12 | 13 | 14 | 15 | 16 | 17 | 18 | 19 | 20 | 21 | 22 | 23 | 24 |
| 1                                                          | 26 | 51 | 76  | 1                                          | 1 | 1 | 3 | 2 | 4 | 1 | 3 | 5 | 8  | 6  | 5  | 12 | 10 | 1  | 6  | 8  | 7  | 19 | 19 | 13 | 21 | 13 | 24 |
| 2                                                          | 27 | 52 | 77  | 1                                          | 2 | 3 | 4 | 3 | 1 | 2 | 2 | 3 | 4  | 8  | 3  | 7  | 2  | 5  | 14 | 4  | 15 | 4  | 8  | 6  | 16 | 14 | 22 |
| 3                                                          | 28 | 53 | 78  | 1                                          | 1 | 2 | 1 | 4 | 2 | 7 | 6 | 9 | 3  | 5  | 11 | 2  | 1  | 3  | 11 | 7  | 10 | 16 | 16 | 10 | 5  | 2  | 2  |
| 4                                                          | 29 | 54 | 79  | 1                                          | 2 | 3 | 2 | 1 | 3 | 5 | 8 | 6 | 2  | 4  | 2  | 4  | 8  | 11 | 10 | 16 | 6  | 9  | 10 | 15 | 11 | 12 | 11 |
| 5                                                          | 30 | 55 | 80  | 1                                          | 1 | 1 | 4 | 5 | 6 | 3 | 5 | 7 | 5  | 9  | 8  | 13 | 3  | 2  | 13 | 5  | 18 | 1  | 4  | 1  | 20 | 11 | 5  |
| 6                                                          | 31 | 56 | 81  | 1                                          | 2 | 2 | 2 | 3 | 5 | 6 | 7 | 8 | 7  | 1  | 4  | 9  | 14 | 8  | 2  | 17 | 17 | 14 | 12 | 14 | 22 | 10 | 3  |
| 7                                                          | 32 | 57 | 82  | 1                                          | 2 | 1 | 1 | 4 | 1 | 4 | 1 | 4 | 6  | 3  | 6  | 5  | 7  | 13 | 9  | 2  | 3  | 13 | 14 | 8  | 2  | 7  | 20 |
| 8                                                          | 33 | 58 | 83  | 1                                          | 1 | 2 | 3 | 2 | 5 | 1 | 4 | 2 | 1  | 7  | 10 | 6  | 5  | 4  | 15 | 10 | 5  | 2  | 13 | 4  | 17 | 5  | 17 |
| 9                                                          | 34 | 59 | 84  | 1                                          | 1 | 3 | 2 | 5 | 6 | 2 | 2 | 1 | 9  | 10 | 1  | 10 | 4  | 6  | 6  | 1  | 9  | 10 | 1  | 5  | 6  | 9  | 1  |
| 10                                                         | 35 | 60 | 85  | 1                                          | 2 | 2 | 4 | 1 | 3 | 3 | 6 | 9 | 10 | 11 | 12 | 3  | 9  | 15 | 7  | 8  | 11 | 6  | 3  | 9  | 4  | 3  | 10 |
| 11                                                         | 36 | 61 | 86  | 1                                          | 1 | 1 | 3 | 1 | 4 | 5 | 3 | 1 | 6  | 2  | 9  | 13 | 11 | 14 | 4  | 11 | 4  | 15 | 15 | 17 | 1  | 1  | 23 |
| 12                                                         | 37 | 62 | 87  | 1                                          | 2 | 3 | 1 | 3 | 2 | 7 | 5 | 6 | 5  | 7  | 7  | 8  | 6  | 10 | 3  | 3  | 1  | 12 | 20 | 7  | 13 | 22 | 12 |
| 13                                                         | 38 | 63 | 88  | 1                                          | 1 | 2 | 1 | 5 | 3 | 6 | 4 | 3 | 4  | 6  | 2  | 11 | 13 | 12 | 1  | 15 | 8  | 7  | 2  | 12 | 15 | 21 | 13 |
| 14                                                         | 39 | 64 | 89  | 1                                          | 2 | 3 | 2 | 4 | 1 | 4 | 7 | 8 | 2  | 5  | 6  | 11 | 12 | 9  | 16 | 13 | 16 | 11 | 18 | 18 | 14 | 16 | 18 |
| 15                                                         | 40 | 65 | 90  | 1                                          | 2 | 1 | 4 | 2 | 4 | 3 | 8 | 7 | 7  | 11 | 1  | 3  | 5  | 7  | 12 | 14 | 13 | 8  | 17 | 20 | 19 | 20 | 19 |
| 16                                                         | 41 | 66 | 91  | 1                                          | 1 | 3 | 3 | 1 | 6 | 5 | 1 | 5 | 9  | 10 | 3  | 2  | 11 | 13 | 8  | 12 | 12 | 5  | 6  | 21 | 8  | 8  | 4  |
| 17                                                         | 42 | 67 | 92  | 1                                          | 1 | 2 | 2 | 3 | 4 | 2 | 6 | 2 | 3  | 2  | 12 | 5  | 2  | 10 | 13 | 5  | 8  | 18 | 9  | 16 | 10 | 17 | 16 |
| 18                                                         | 43 | 68 | 93  | 1                                          | 2 | 1 | 4 | 2 | 6 | 4 | 1 | 4 | 8  | 9  | 10 | 7  | 9  | 3  | 12 | 12 | 9  | 7  | 20 | 19 | 9  | 19 | 21 |
| 19                                                         | 44 | 69 | 94  | 1                                          | 2 | 2 | 1 | 3 | 5 | 2 | 8 | 9 | 10 | 4  | 9  | 8  | 13 | 1  | 1  | 14 | 10 | 19 | 10 | 11 | 18 | 15 | 7  |
| 20                                                         | 45 | 70 | 95  | 1                                          | 1 | 3 | 2 | 5 | 4 | 1 | 3 | 8 | 1  | 3  | 8  | 6  | 6  | 9  | 5  | 7  | 13 | 4  | 15 | 1  | 7  | 22 | 15 |
| 21                                                         | 46 | 71 | 96  | 1                                          | 1 | 1 | 2 | 5 | 1 | 7 | 2 | 3 | 2  | 1  | 11 | 4  | 7  | 5  | 3  | 2  | 1  | 3  | 12 | 18 | 5  | 19 | 14 |
| 22                                                         | 47 | 72 | 97  | 1                                          | 2 | 1 | 3 | 1 | 3 | 2 | 6 | 2 | 1  | 8  | 7  | 1  | 4  | 2  | 11 | 8  | 2  | 17 | 4  | 17 | 21 | 16 | 3  |
| 23                                                         | 48 | 73 | 98  | 1                                          | 2 | 3 | 4 | 2 | 2 | 6 | 7 | 7 | 8  | 3  | 4  | 9  | 3  | 6  | 2  | 11 | 11 | 16 | 2  | 8  | 11 | 23 | 6  |
| 24                                                         | 49 | 74 | 99  | 1                                          | 1 | 2 | 1 | 4 | 6 | 3 | 5 | 5 | 3  | 1  | 5  | 13 | 1  | 14 | 8  | 14 | 6  | 15 | 9  | 14 | 3  | 6  | 9  |
| 25                                                         | 50 | 75 | 100 | 1                                          | 1 | 2 | 3 | 3 | 2 | 4 | 6 | 4 | 7  | 5  | 3  | 12 | 12 | 12 | 4  | 6  | 2  | 17 | 11 | 2  | 12 | 4  | 8  |
